# Supplementary material for: Bubble-mediated generation of airborne nanoplastic particles
Source: Royal Society of Chemistry journal article supplement (doi:10.1039/d4em00124a), 2024-01-01
Supplement: d4em00124a1.pdf [file d4em00124a1.pdf]

1

## Supporting Information:

2

# Bubble-Mediated Formation of Airborne

3

# Nanoplastic Particles

4

*Eva R. Kjærsgaard<sup>1</sup>, Freja Hasager<sup>1</sup>, Sarah S. Petters<sup>1,2</sup>, Marianne Glasius<sup>1</sup>, Merete Bilde<sup>1\*</sup>*

5

<sup>1</sup>Department of Chemistry, Aarhus University, DK-8000 Aarhus C, Denmark

6

<sup>2</sup> Current address: Center for Environmental Research and Technology, University of California,

7

Riverside, 92507 California, USA

8

This supplement contains 21 pages.

|    |                                                                           |    |
|----|---------------------------------------------------------------------------|----|
| 9  | <b>Table of Contents</b>                                                  |    |
| 10 | Section S1: Experimental Supplement.....                                  | 3  |
| 11 | S1.1 Synthetic sea salt.....                                              | 3  |
| 12 | S1.2 Schematic of the experimental set-up.....                            | 3  |
| 13 | S1.3 AEGOR headspace equilibrium considerations .....                     | 4  |
| 14 | Section S2. Integration of SMPS number distributions .....                | 7  |
| 15 | Section S3. Filter sampling.....                                          | 10 |
| 16 | Section S4. Experimental time evolution of PSL number concentration ..... | 11 |
| 17 | Section S5. SMPS Transfer function .....                                  | 14 |
| 18 | Section S6. Full SMPS size spectra .....                                  | 16 |
| 19 | Section S7. Particles outside the PSL peaks .....                         | 18 |
| 20 | Section S8. Test of reproducibility .....                                 | 19 |
| 21 | Section S9. Salt experiments.....                                         | 20 |
| 22 | References.....                                                           | 21 |
| 23 |                                                                           |    |
| 24 |                                                                           |    |

## 25 SECTION S1: EXPERIMENTAL SUPPLEMENT

### 26 S1.1 Synthetic sea salt

27 **Table S1.** Information on the synthetic sea salt used in this study, which was mixed following Nielsen and Bilde <sup>1</sup>.

| Salt                                 | M <sub>w</sub> (g mol <sup>-1</sup> ) | Purity *                                     | CAS Number |
|--------------------------------------|---------------------------------------|----------------------------------------------|------------|
| NaCl                                 | 58.44                                 | Puriss, p.a. ≥ 99.5 % (AT)                   | 7647-14-5  |
| MgCl <sub>2</sub> ·6H <sub>2</sub> O | 203.30                                | BioXtra ≥ 99.0 %                             | 7791-18-6  |
| CaCl <sub>2</sub> ·2H <sub>2</sub> O | 147.01                                | BioUltra for molecular biology ≥ 99.5 % (RT) | 10035-04-8 |
| KNO <sub>3</sub>                     | 101.10                                | BioUltra for molecular biology ≥ 99.5 % (RT) | 7757-79-1  |
| NaBr                                 | 102.89                                | ≥ 99.0 % ACS reagent                         | 7647-15-6  |
| K <sub>2</sub> SO <sub>4</sub>       | 174.26                                | ≥ 99.0 % ACS reagent                         | 7778-80-5  |
| Na <sub>2</sub> SO <sub>4</sub>      | 142.04                                | ≥ 99.0 % ACS reagent                         | 7757-82-6  |

28 \*Supplier: Sigma-Aldrich

29

### 30 S1.2 Schematic of the experimental set-up

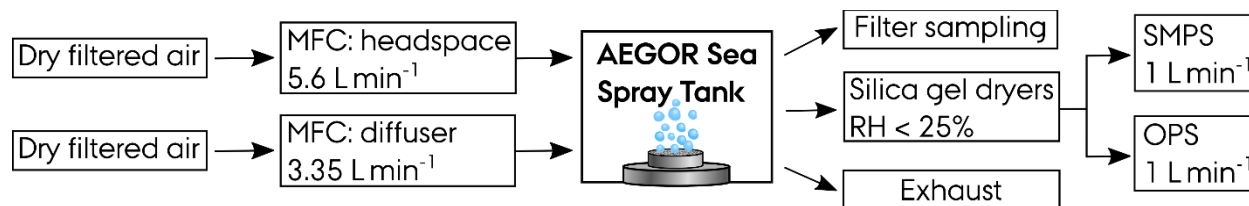

31

32 **Figure S1.** Schematic of the experimental set-up and flows, used in this study. See also Christiansen et al. 2019.<sup>2</sup> In  
33 Experiment 5 a consecutive series of experiments were performed with an HTDMA and an aerosol mass spectrometer  
34 attached to the headspace, these are further described in Petters et al.<sup>3</sup> Filter sampling was performed in some  
35 experiments (2, 4 and 5d) after completion of the SMPS measurements. During filter sampling the SMPS and OPS  
36 were not running.

37

38

39 **S1.3 AEGOR headspace equilibrium considerations**

40 **S1.3.1 Flow diagram**

41 Figure S2 is a simplified flow diagram of the AEGOR headspace. In the tank headspace, the  
 42 incoming clean air (flow  $Q_{in}$ , L/min) carries no particles. The outgoing air carries particles with  
 43 time-dependent concentration  $c(t)$ , or  $\frac{1}{V}N(t)$ . An additional source of particles is the bubbling,  
 44 which provides a constant  $\frac{dN}{dt}_{bubble}$  of  $r_0$  in units of  $\# L^{-1} \text{ min}^{-1}$ .

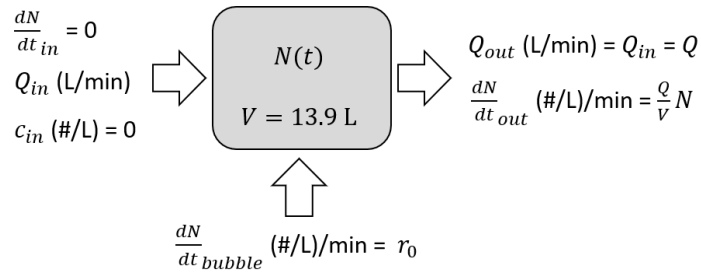

45  
 46 **Figure S2.** Diagram for time-dependent concentration of particles in the tank. The total flow in,  $Q$ , is  $8.95 \text{ L min}^{-1}$ ,  
 47 and the flow out is split between waste and instruments.

48 The equation describing the change in number concentration in the tank is therefore:

49 
$$\frac{dN(t)}{dt} = -\frac{dN}{dt}_{out} + \frac{dN}{dt}_{bubble} + \frac{dN}{dt}_{in} \quad (\text{S1})$$

50 
$$\frac{dN(t)}{dt} = -\frac{dN}{dt}_{out} + r_0 + 0 \quad (\text{S2})$$

51 
$$\frac{dN(t)}{dt} = r_0 - \frac{dN}{dt}_{out} \quad (\text{S3})$$

52 Equation S3 can be solved for  $N(t)$  by using the integrating factor method. The equation can  
 53 be expressed in a standard form  $\frac{dy}{dx} + a(x)y = b(x)$  with a solution  $y(x) =$   
 54  $\exp^{-1}(\int a(x)dx) (B(x) + C_3)$ , where  $C_3$  is an integration constant and the term  $B(x)$  is defined  
 55 by  $B(x) = \int ( e^{\int a(x)dx} b(x) ) dx$ . The integrating factor is  $e^{\int a(x)dx}$  and is defined to assist in  
 56 the derivation.

57 **Section S1.3.2 The solution**

58 A series of steps are taken to match the equation set up for AEGOR with the solution in its  
 59 standard form:

60 Standard form This work

61  $\frac{dy}{dx} + a(x)y = b(x)$   $\frac{dN(t)}{dt} + \frac{Q}{V}N(t) = r_0$  (S4)

62  $x$   $t$  (S5)

63  $y$   $N = N(t)$  (S6)

64  $a(x)$   $Q/V = \text{constant}$  (S7)

65  $b(x)$   $r_0 = \text{constant}$  (S8)

66  $\int a(x)dx$   $\int \frac{Q}{V} dt = \frac{Qt}{V}$  (S9)

67 Integration factor:  $e^{\int a(x)dx}$   $e^{Qt/V}$  (S10)

68  $b(x)e^{\int a(x)dx}$   $r_0e^{Qt/V}$  (S11)

69  $B(x) = \int (b(x)e^{\int a(x)dx})dx$   $B(x) = \int (r_0e^{Qt/V}) dt = \frac{r_0V}{Q}e^{Qt/V}$  (S12)

70  $B(x) + C_3$   $\frac{r_0V}{Q}e^{Qt/V} + C_3$  (S13)

71  $y = e^{-\int a(x)dx}(B(x) + C_3)$   $N(t) = e^{-Qt/V} \left( \frac{r_0Q}{V}e^{Qt/V} + C_3 \right)$  (S14)

72  $y = C_3 e^{-\int a(x)dx} + B(x) e^{-\int a(x)dx}$   $N(t) = C_3e^{-Qt/V} + r_0Q/V$  (S15)

73 **Solution**

74 The initial value problem is solved to find  $C_3$ :

75  $N(t = 0) = 0$  (S16)

76  $C_3e^0 + \frac{r_0Q}{V} = 0$  (S17)

77  $C_3 = -\frac{r_0Q}{V}$  (S18)

78 The general form of the solution is:

79 
$$N(t) = \frac{r_0 Q}{V} (1 - e^{-Qt/V}) \quad (\text{S19})$$

80 **Equilibrium concentration**

81 To find the equilibrium concentration, the solution is assessed at  $t = \infty$ .

82 
$$N(t = \infty) = \frac{r_0 Q}{V} (1 - e^{-Q\infty/V}) \quad (\text{S20})$$

83 
$$N(t = \infty) = \frac{r_0 Q}{V} \quad (\text{S21})$$

84 The equilibrium concentration is  $r_0 Q/V$ .

85 **Equilibrium time**

86 The time to reach 95% of the equilibrium concentration,  $\tau_{95}$ , is found as follows:

87 
$$0.95 \frac{r_0 Q}{V} = \frac{r_0 Q}{V} (1 - e^{-Q\tau_{95}/V}) \quad (\text{S22})$$

88 
$$0.95 = 1 - e^{-Q\tau_{95}/V} \quad (\text{S23})$$

89 
$$e^{-Q\tau_{95}/V} = 1 - 0.95 \quad (\text{S24})$$

90 
$$-\frac{Q\tau_{95}}{V} = \ln(0.05) \quad (\text{S25})$$

91 
$$\tau_{95} = -\frac{V}{Q} \ln(0.05) \quad (\text{S26})$$

92 The volume of the headspace,  $V$ , is 13.9 L, and total flow,  $Q$ , is  $5.6 + 3.35 = 8.95 \text{ L min}^{-1}$ . The  
 93 time to reach 95% of equilibrium is:

94 
$$\tau_{95} = -\frac{13.9 \text{ L}}{8.95 \text{ L/min}} \ln(0.05) = -\frac{13.9}{8.95} (-2.9957) \text{ min} = 4.6526 \text{ min}$$

95 which is about 280 s or 4.7 minutes.

96

97

98 **SECTION S2. INTEGRATION OF SMPS NUMBER DISTRIBUTIONS**

99 The PSL number concentrations, presented in Table 2 in the manuscript, were determined by  
 100 fitting a single log-normal distribution to  $dN/d\log(Dp)$  versus  $Dp$  (see Table S2 for fitting  
 101 parameters).. For Experiment 5, which contained salt, the PSL number concentration was also  
 102 determined by a sum of 2 log-normal distributions (equation 8.54 in Seinfeld and Pandis<sup>4</sup>):

$$103 \quad n_N(\log Dp) = \sum_{i=1}^n \frac{N_i}{(2\pi)^{\frac{1}{2}} \log \sigma_i} \exp\left(-\frac{(\log Dp - \log \bar{D}p_i)^2}{2 \log^2 \sigma_i}\right) \quad (S27)$$

104 where  $N_i$  is the number concentration,  $\bar{D}p_i$  is the median particle diameter and  $\sigma_i$  is the standard  
 105 deviation of the  $i$ 'th lognormal mode. The obtained fitting parameters for the double log-normal  
 106 fits are given in Table S3. Due to the very large difference in number concentration of salt and  
 107 PSL particles, fitting a sum of log-normal distributions to the data is challenging. Therefore, the  
 108 single log-normal distribution fits to this data can be considered as upper-limit number  
 109 concentration values. For single log-normal fits it was not possible to fit experiment 5e due to large  
 110 influence of salt and experiment 6a and 6b due to low signal. Regarding Table 2 number  
 111 concentration values reported in the main manuscript, for experiment 5e the double log-normal fit  
 112 value was used and for experiments 6a and 6b the sum of  $dN$  values over the range of 60-155 nm  
 113 was used.

114 **Table S2.** Fitting parameters for a single log-normal fit of  $dN/d\log(Dp)$  as a function of  $Dp$ .  $N_1$  is the number  
 115 concentration,  $Dp_1$  is the median diameter and  $\sigma_1$  is the standard deviation. It was not possible to fit Experiment 5e  
 116 and 6a-6b.

| Experiment | $N_1$ (cm <sup>-3</sup> ) | $\sigma_1$ | $Dp_1$ (nm) | Fitting range (nm) |
|------------|---------------------------|------------|-------------|--------------------|
| 1          | 12.54                     | 1.071      | 145.0       | 70.4-355.5         |
| 2          | 29.74                     | 1.070      | 145.0       | 70.4-355.5         |
| 3a         | 12.73                     | 1.070      | 145.0       | 70.4-355.5         |

|     |       |       |       |              |
|-----|-------|-------|-------|--------------|
| 3b  | 5.591 | 1.071 | 144.3 | 70.4-355.5   |
| 3c  | 2.119 | 1.083 | 144.2 | 70.4-355.5   |
| 3d  | 1.420 | 1.154 | 145.4 | 100.9-207.2  |
| 4   | 3.039 | 1.083 | 262.1 | 70.4-537.6   |
| 5 * | 10.45 | 1.071 | 142.6 | 70.4-537.6   |
| 5a  | 30.10 | 1.095 | 142.6 | 70.4-537.6   |
| 5b  | 24.14 | 1.078 | 143.2 | 70.4-355.5   |
| 5c  | 25.15 | 1.084 | 143.8 | 100.9-355.5  |
| 5d  | 33.78 | 1.102 | 142.9 | 118.64-355.5 |
| 5e  | -     | -     | -     | -            |
| 6a  | -     | -     | -     | -            |
| 6b  | -     | -     | -     | -            |
| 6c  | 31.42 | 1.167 | 97.77 | 59.89-155.38 |
| 6d  | 44.76 | 1.150 | 98.39 | 59.89-155.38 |
| 6e  | 56.81 | 1.161 | 98.04 | 59.89-155.38 |
| 6f  | 71.99 | 1.155 | 98.10 | 59.89-155.38 |

117 \*Data have been baseline corrected. Without baseline correction  $N_1 = 18 \text{ cm}^{-3}$ .

118



119 **Table S3.** Fitting parameters for a sum of 2 log-normal fits of  $dN/d\log(D_p)$  as a function of  $D_p$  for salinity experiments  
 120 ranging from 0.01 to 0.2 g kg<sup>-1</sup> (Experiment 5).  $N_i$  is the number concentration,  $D_{p_i}$  is the median diameter and  $\sigma_i$  is  
 121 the standard deviation of the  $i$ 'th lognormal mode. The PSL peak is mode 2.

|                             | $N_1$ (cm <sup>-3</sup> ) | $\sigma_1$ | $D_{p_1}$ (nm) | $N_2$ (cm <sup>-3</sup> ) | $\sigma_2$ | $D_{p_2}$ (nm) | Fitting range (nm) |
|-----------------------------|---------------------------|------------|----------------|---------------------------|------------|----------------|--------------------|
| 5a: 0.01 g kg <sup>-1</sup> | 333.8                     | 1.883      | 29.19          | 24.6                      | 1.0771     | 143.6          | 58.8-355.5         |
| 5b: 0.02 g kg <sup>-1</sup> | 314.7                     | 1.669      | 31.58          | 22.6                      | 1.0730     | 143.6          | 74.3-355.5         |
| 5c: 0.05 g kg <sup>-1</sup> | 294.6                     | 1.410      | 23.20          | 23.2                      | 1.0765     | 144.4          | 85.8-355.5         |
| 5d: 0.1 g kg <sup>-1</sup>  | 1875                      | 1.307      | 55.01          | 28.6                      | 1.0838     | 144.9          | 84.3-355.5         |
| 5e: 0.2 g kg <sup>-1</sup>  | 3379                      | 1.299      | 66.55          | 40.7                      | 1.1026     | 147.1          | 100.9-355.5        |

122

123

124

125

126

127

128

129 **SECTION S3. FILTER SAMPLING**

130 Aerosol filters from Experiments 2, 4 and 5d, were analyzed with py-GC-MS by preparing  
131 filter punch outs of 3 mm diameters, which were analyzed in triplicates.

132 Sampling on filters was performed overnight: Experiment 2: 14 hrs 17 min, 2.9 L min<sup>-1</sup>  
133 flowrate), Experiment 4: 20 hrs 33 min, 1.6 L min<sup>-1</sup> flow rate and Experiment 5d: for salinity 0.1  
134 g/kg 14 hrs 9 min, 1.6 L min<sup>-1</sup> flow rate.

135

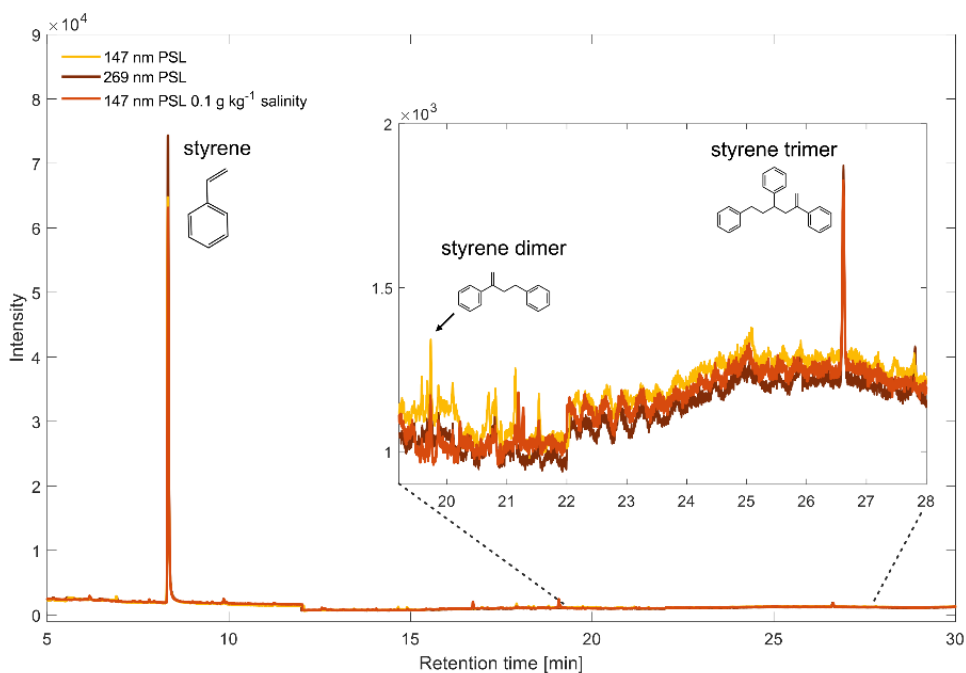

136

137 **Figure S4.** Pyrograms from the py-GCMS analysis of particle filters collected during the experiments with 147 nm  
138 PSL in milli-Q water (yellow), 269 nm PSL in milli-Q water (brown), and 147 nm PSL in 0.1 g kg<sup>-1</sup> saline water  
139 (orange). The inset shows a zoom of the 19-28 min retention time window. Peaks from polystyrene marker compounds  
140 are labeled.

141 Figure S4 shows the pyrograms obtained from py-GCMS analysis of filter punch-outs from  
142 experiments 2, 4, and 5d. During pyrolysis, polystyrene fragments into the styrene monomer,

143 styrene dimer, and styrene trimer. The styrene monomer can arise from the pyrolysis of several  
144 synthetic polymers, while the styrene dimer and trimer are characteristic only of polystyrene. The  
145 presence of these two marker compounds confirms that polystyrene particles were collected on the  
146 filters in the three experiments.

147

#### 148 SECTION S4. EXPERIMENTAL TIME EVOLUTION OF PSL NUMBER 149 CONCENTRATION

150 Figures S5a – S5d show the number concentration of polystyrene (PSL) particles as a function  
151 of experiment time, obtained by taking a sum of the number concentration (dN) in the range of the  
152 PSL peak in the SMPS spectra. The range was chosen from the log-normal fit to the PSL peak,  
153 where the number concentration value was smaller than  $0.1 \text{ cm}^{-3}$ .

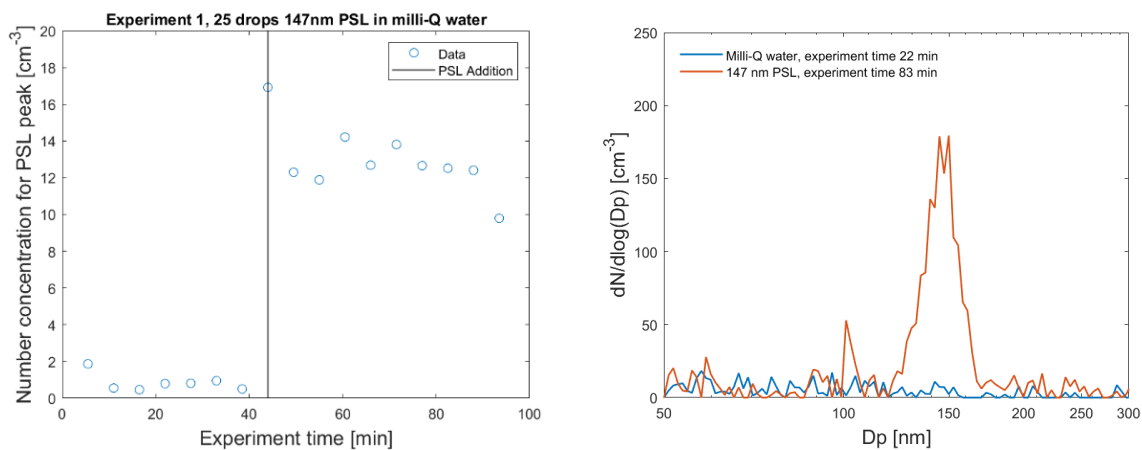

154

155 **Figure S5a.** Number concentration of PSL particles as a function of experimental time for experiment 1 (blue). The  
156 black line shows the time at which the tank was opened and PSL was added. The number concentration was obtained  
157 by taking a sum of dN values in the range 110-189 nm, corresponding to the PSL peak. The left figure shows a  
158 comparison of a scan of milli-Q water and after PSL addition.

159

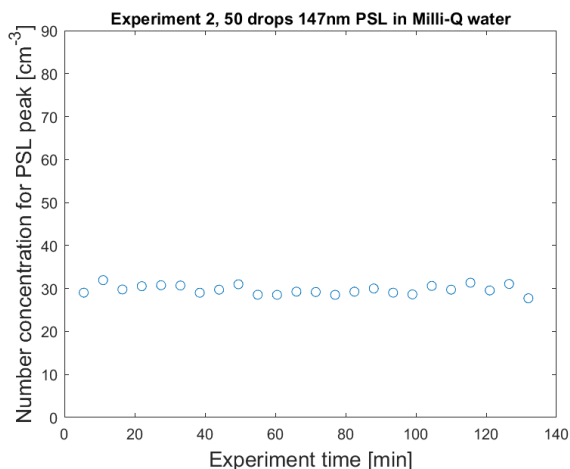

160  
 161 **Figure S5b.** Number concentration of PSL particles as a function of experimental time for experiment 2. The number  
 162 concentration was obtained by taking a sum of dN values in the range 110-189 nm, corresponding to the PSL peak.  
 163 The left figure shows a comparison of a scan of milli-Q water and after PSL addition.

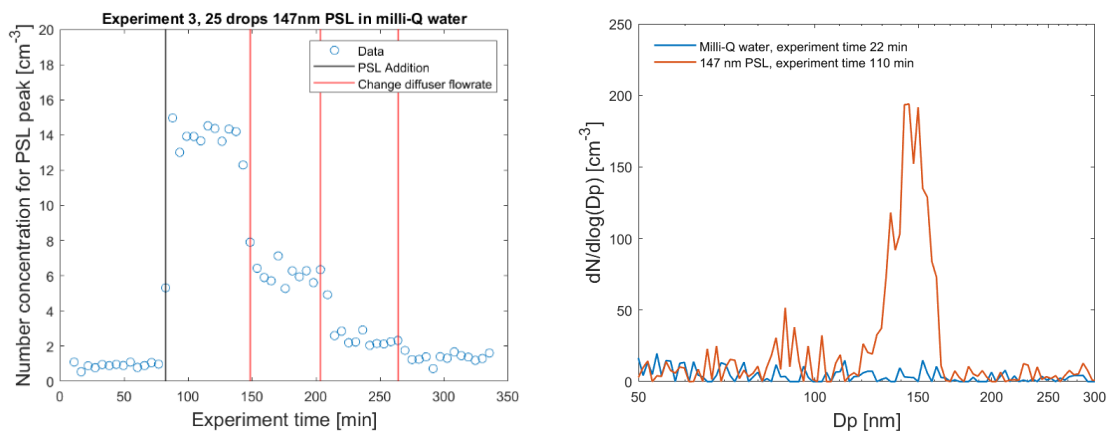

164  
 165 **Figure S5c.** Number concentration of PSL particles as a function of experimental time for experiment 3 (blue). The  
 166 black line shows the time at which the tank was opened and PSL was added. The red lines show the time when the  
 167 diffuser flow rate was decreased. The number concentration was obtained by taking a sum of dN values in the range  
 168 110-189 nm, corresponding to the PSL peak. The left figure shows a comparison of a scan of milli-Q water and after  
 169 PSL addition.

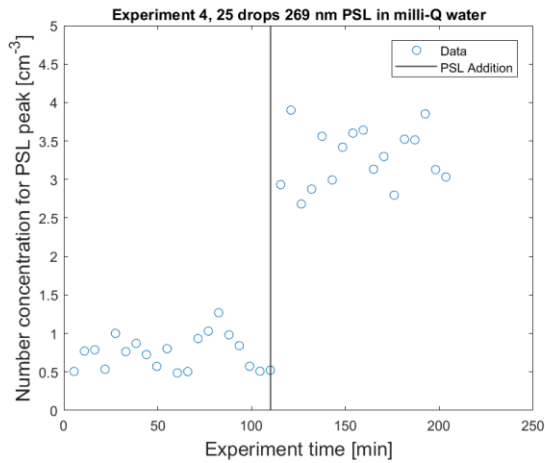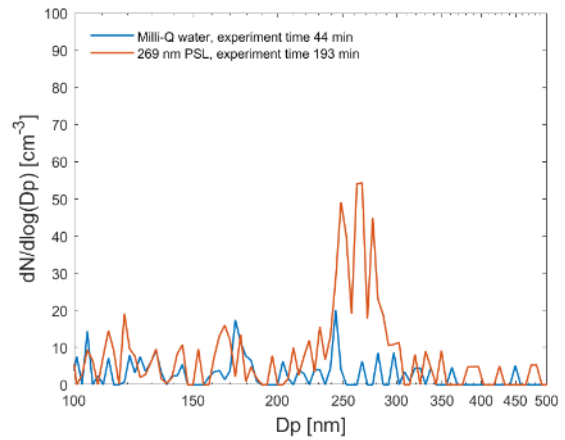

170

171 **Figure S5d.** Number concentration of PSL particles as a function of experimental time for experiment 4 (blue). The  
 172 black line shows the time at which the tank was opened and PSL was added. The number concentration was obtained  
 173 by taking a sum of dN values in the range 196-350 nm, corresponding to the PSL peak. The left figure shows a  
 174 comparison of a scan of milli-Q water and after PSL addition.

175

176

177 **SECTION S5. SMPS TRANSFER FUNCTION**

178 Figure S6 shows a comparison of the experimental results for 25 drops of 147 nm PSL in milli-  
179 Q water (orange) from Experiment 1, and the SMPS transfer functions. The purple function is the  
180 probability density functional (PDF) centered at 147 nm for the 4.3 nm standard deviation that is  
181 given for the diameter of the PSL nanospheres. The experimental results show a peak wider than  
182 the standard deviation of the PSL nanospheres (orange vs. purple) and therefore the width of the  
183 peak cannot arise solely from this. The black lines in Figure S6 represent the outer lines of a non-  
184 diffuse transfer function for a flow ratio of  $\beta=1.0/5.0$  ( $\delta=0$ ) at DMA centroid diameter  $D_p^* = 147$   
185 nm, calculated with Stolzenburg and McMurry<sup>5</sup>. These bounds are slightly wider than the  
186 experimental results shown in orange, which means the widening of the experimental PSL peak  
187 can be explained by the transfer function.

188 Additionally, we have calculated the overlap (green function in Figure S6) of the theoretical  
189 transfer functions for each bin with the PDF of the PSL nanospheres. This was done by calculating  
190 a non-diffuse transfer function for a flow ratio of  $\beta=1.0/5.0$  ( $\delta=0$ ) and DMA centroid diameters  
191 ranging  $D_p^* = 10-300$  nm in intervals of 1 nm. Then creating a probability density functional for  
192 each. By multiplying the calculated PDFs with the PDF for the PSL nanospheres (the purple  
193 function in Figure S6) we obtain the overlap for each point in the diameter range. These are  
194 summed giving a value for the overlap between the transfer functions for each bin with the PDF  
195 of the PSL nanospheres, plotted in green in Figure S6. This function is slightly wider than the  
196 experimental PSL peak, which again shows that the widening of the experimental PSL peak can  
197 be explained by the transfer function.

198

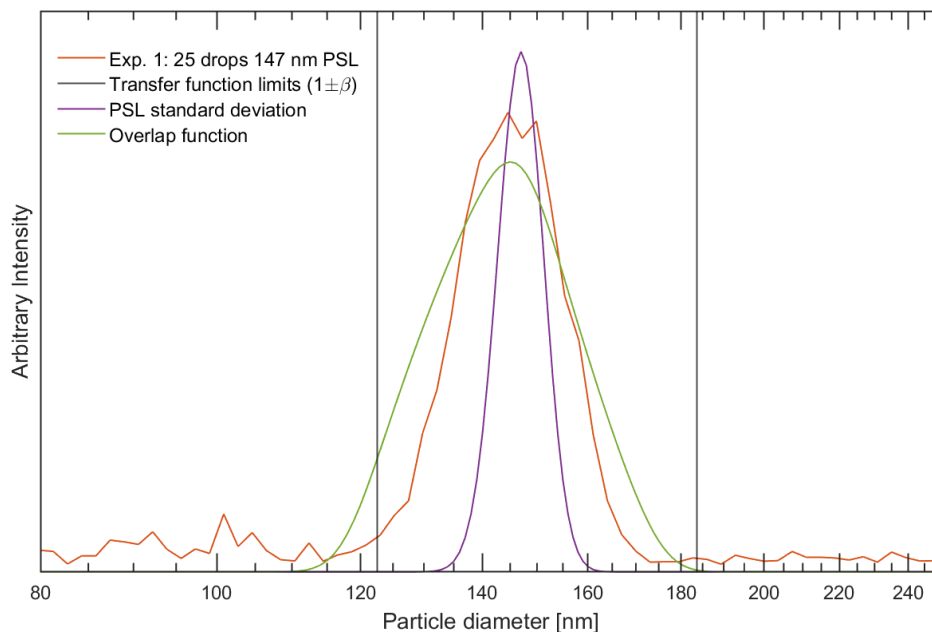

199  
 200 **Figure S6.** Experimental results for 25 drops of 147 nm PSL in milli-Q water (orange) from Experiment 1. The black  
 201 lines represent the outer lines of a non-diffuse transfer function for a flow ratio of  $\beta=1.0/5.0$  ( $\delta=0$ ) at DMA centroid  
 202 diameter  $D_p^* = 147$  nm, calculated with Stolzenburg and McMurry<sup>5</sup>. The purple function is the probability density  
 203 functional (PDF) centered at 147 nm for the 4.3 nm standard deviation that is given for the diameter of the PSL  
 204 nanospheres (multiplied by a factor 2000 to obtain comparable y-axis). The green function shows the overlap of the  
 205 transfer function for each bin with the PDF of the PSL nanospheres, the purple function, multiplied by a factor 5000  
 206 to obtain comparable y-axis.

207

208 SECTION S6. FULL SMPS SIZE SPECTRA

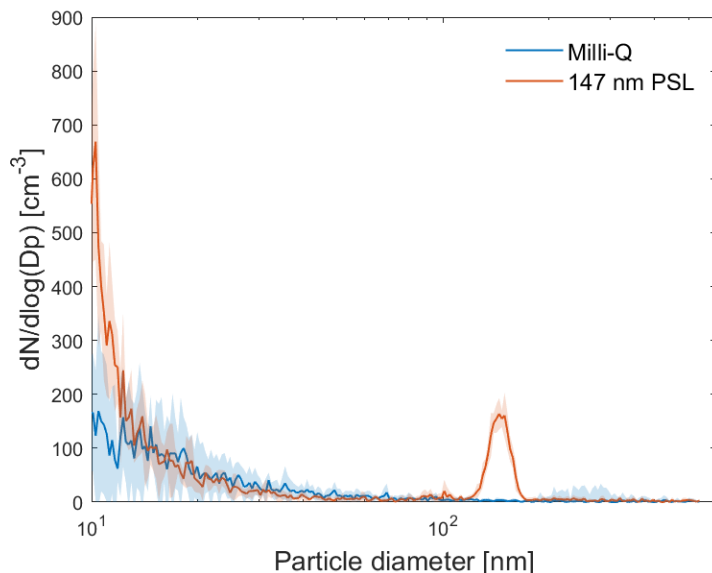

209  
210 **Figure S7a.** Mean particle number size distribution measured by the SMPS (headspace air) for a solution of 20 L  
211 milli-Q water (blue) and after addition of 25 drops of 147 nm PSL (orange), from Experiment 1. Diffuser flow rate of  
212  $3.35 \text{ L min}^{-1}$  and temperature was held constant at  $20^\circ\text{C}$ . All data are averaged of 30 min (5 scans) and 1 standard  
213 deviation is shown as a shading.

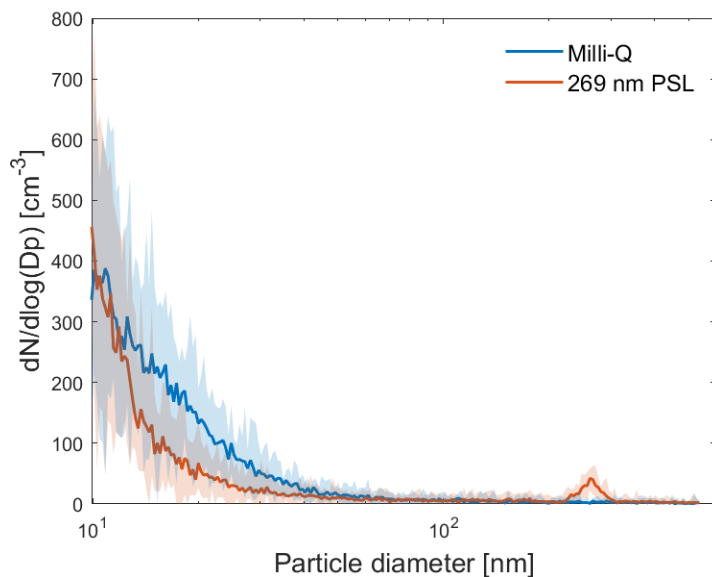

214  
215 **Figure S7b.** Mean particle number size distribution measured by the SMPS (headspace air) for a solution of 20 L  
216 milli-Q water (blue) and after addition of 25 drops of 269 nm PSL (orange) from Experiment 4. Diffuser flow rate of  
217  $3.35 \text{ L min}^{-1}$  and temperature was held constant at  $20^\circ\text{C}$ . All data are averaged of 30 min (5 scans) and 1 standard  
218 deviation is shown as a shading.



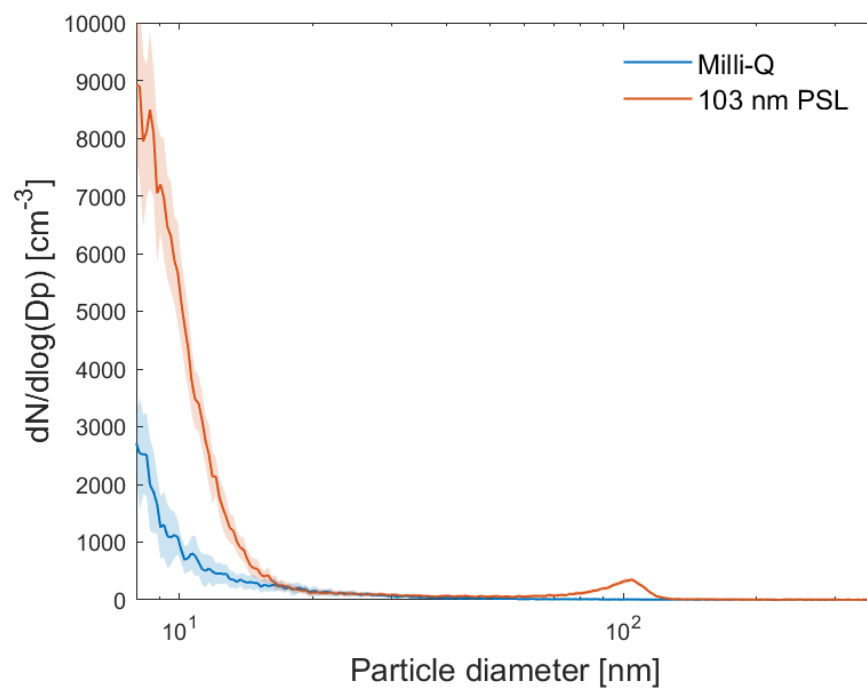

219

220 **Figure S7c.** Mean particle number size distribution measured by the SMPS (headspace air) for a solution of 20 L  
221 milli-Q water (blue) and after addition of 30 drops of 103 nm PSL (orange) from experiment 6. Diffuser flow rate of  
222 3.35 L min<sup>-1</sup> and temperature was held constant at 20°C. All data are averaged of 30 min (5 scans) and 1 standard  
223 deviation is shown as a shading.

224

225

226 **SECTION S7. PARTICLES OUTSIDE THE PSL PEAKS**

227 The optical spectrum reported by the OPS in the size range 0.3–10  $\mu\text{m}$  showed fewer than 1  
228 particle  $\text{cm}^{-3}$  (Figure S8; Experiment 1 in Table 1). The mobility spectra reported by the SMPS  
229 data ranging from the PSL peak up to 538 nm showed no clear peaks above the signal-to-noise  
230 limit. In Experiment 1, fewer than 8  $\text{cm}^{-3}$  particles are observed above 200 nm, and in Experiment  
231 4 fewer than 1  $\text{cm}^{-3}$  particles are observed above 300 nm (see Section S6).

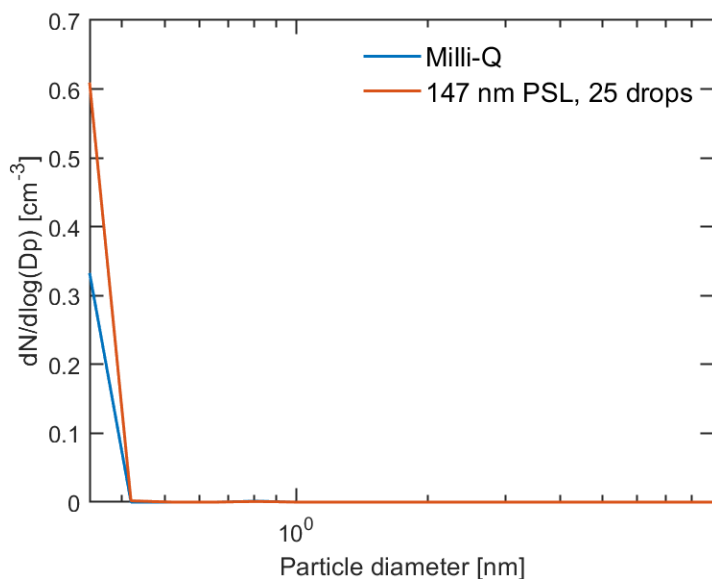

232  
233 **Figure S8.** Mean particle number size distribution measured by the OPS for a solution of 20 L milli-Q water (blue)  
234 and after addition of 25 drops of 147 nm PSL (orange) from experiment 1. Diffuser flow rate of  $3.35 \text{ L min}^{-1}$  and a  
235 constant temperature of  $20^\circ\text{C}$ . Data are averaged over 15 min for Milli-Q and 55 min for PSL. Note the y-axis goes  
236 from 0-0.7  $\text{cm}^{-3}$ .

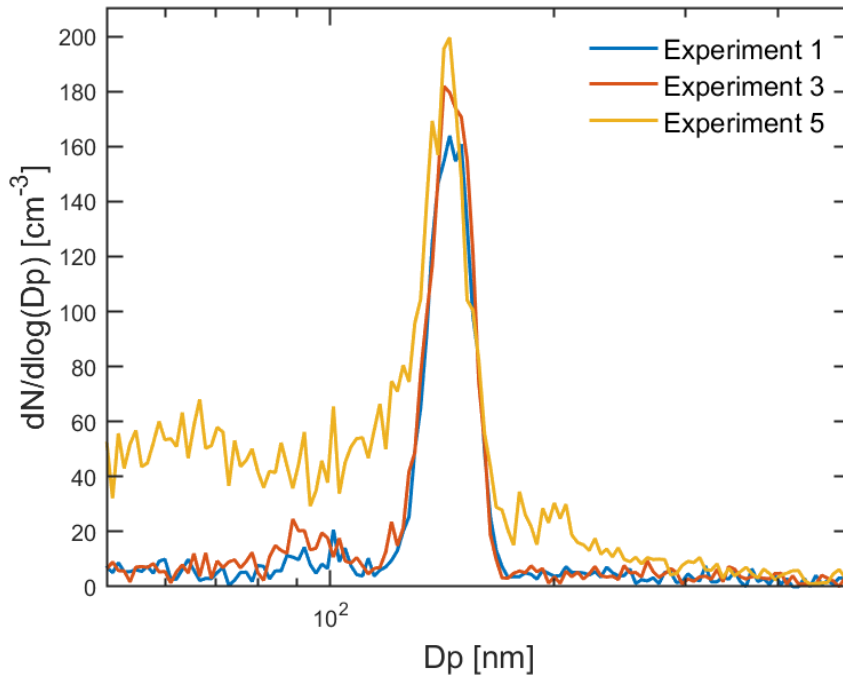

238

239 **Figure S9.** Mean particle number concentration measured from the headspace in AEGOR by the SMPS for a solution  
 240 of 20 L milli-Q water containing 25 drops of 147 nm PSL. Experiments were performed with the diffuser set to 3.35  
 241 L min<sup>-1</sup> and a constant temperature of 20°C. Comparison of Experiment 1 (blue), Experiment 3 (orange) and  
 242 Experiment 5 (yellow, 0 g kg<sup>-1</sup> salt). All data is an average of 30 min (5 scans) measurement.

243

244 The particle number size distributions from the three experiments show the same shape and  
 245 the integrated number concentrations of the PSL peak differ by less than three particles cm<sup>-3</sup>:  
 246 Experiment 1 (12.5 cm<sup>-3</sup>) and Experiment 3 (12.7 cm<sup>-3</sup>) based on log-normal fitting, Experiment 5  
 247 (0 g kg<sup>-1</sup> salt) the number concentration is 10.5 cm<sup>-3</sup> accounting for the background (see also S31).

248

249

250

251 SECTION S9. SALT EXPERIMENTS

252

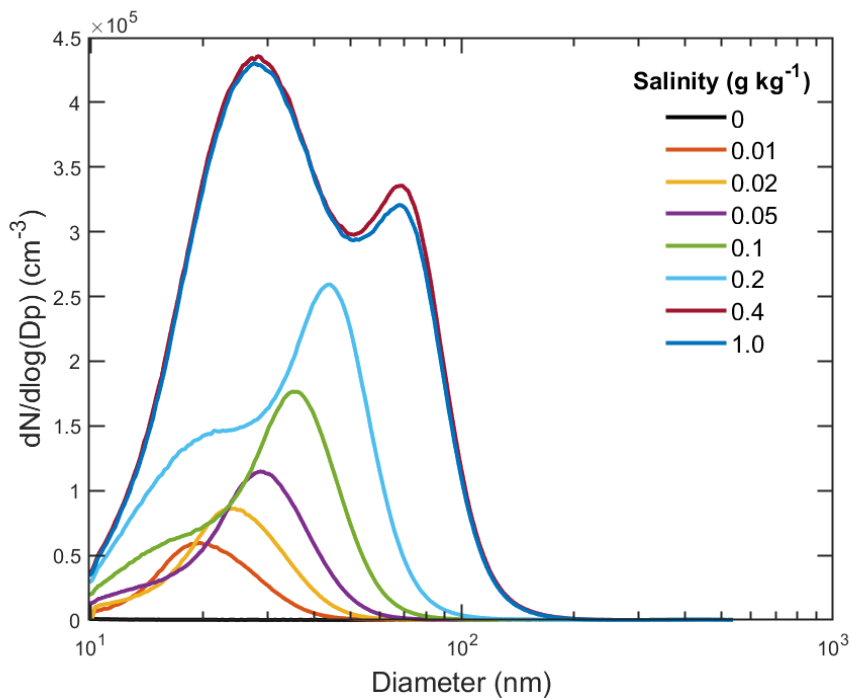

253

254 **Figure S10.** Mean particle number size distribution measured by the SMPS for a solution of 20 L milli-Q water  
255 containing 25 drops of 147 nm PSL and varying salinity of sea salt. Diffuser set to 3.35 L min<sup>-1</sup> and a constant  
256 temperature of 20 °C (Experiment 5). All data is an average of 78 min (13 scans).

257

258

259 **REFERENCES**

- 260 1. Nielsen, L. S.; Bilde, M., Exploring Controlling Factors for Sea Spray Aerosol Production:  
261 Temperature, Inorganic Ions and Organic Surfactants. *Tellus B: Chemical and Physical Meteorology* **2020**,  
262 72, 1-10.
- 263 2. Christiansen, S.; Salter, M. E.; Gorokhova, E.; Nguyen, Q. T.; Bilde, M., Sea Spray Aerosol Formation:  
264 Laboratory Results on the Role of Air Entrainment, Water Temperature, and Phytoplankton Biomass.  
265 *Environmental Science & Technology* **2019**, 53, 13107-13116.
- 266 3. Petters, S. S.; Kjærgaard, E. R.; Hasager, F.; Massling, A.; Glasius, M.; Bilde, M., Morphology and  
267 Hygroscopicity of Nanoplastics in Sea Spray. *Physical Chemistry Chemical Physics* **2023**.
- 268 4. Seinfeld, J. H.; Pandis, S. N., *Atmospheric Chemistry and Physics: From Air Pollution to Climate*  
269 *Change*; John Wiley & Sons, 2016.
- 270 5. Stolzenburg, M. R.; McMurry, P. H., Equations Governing Single and Tandem Dma Configurations  
271 and a New Lognormal Approximation to the Transfer Function. *Aerosol Science and Technology* **2008**,  
272 42, 421-432.
- 273
