# Supplementary material for: Bubble-mediated generation of airborne nanoplastic particles
Source: Royal Society of Chemistry journal article supplement (doi:10.1039/d4em00124a), 2024-01-01
Supplement: d4em00124a2.xlsx [file d4em00124a2.xlsx]

## Sheet: Ark1
Figure 1A	MilliQ min.	MilliQ average	MilliQ max.	PSL 103nm min.	PSL 103nm average	PSL 103nm max.		Figure 1B	MilliQ min.	MilliQ average	MilliQ max.	PSL 147nm min.	PSL 147nm average	PSL 147nm max.		Figure 1C	MilliQ min.	MilliQ average	MilliQ max.	PSL 269nm min.	PSL 269nm average	PSL 269nm max.
Dp (nm)	dNdlogDp (cm^-3)	dNdlogDp (cm^-3)	dNdlogDp (cm^-3)	dNdlogDp (cm^-3)	dNdlogDp (cm^-3)	dNdlogDp (cm^-3)		Dp (nm)	dNdlogDp (cm^-3)	dNdlogDp (cm^-3)	dNdlogDp (cm^-3)	dNdlogDp (cm^-3)	dNdlogDp (cm^-3)	dNdlogDp (cm^-3)		Dp (nm)	dNdlogDp (cm^-3)	dNdlogDp (cm^-3)	dNdlogDp (cm^-3)	dNdlogDp (cm^-3)	dNdlogDp (cm^-3)	dNdlogDp (cm^-3)
9.91	59.4708	165.458	271.446	7672.06	8913.97	10155.9		7.99	2242.44	2715.06	3187.69	310.138	494.216	678.293		9.91	218.171	336.246	454.321	322.201	456.527	590.853
10.09	56.6822	165.922	275.161	7297.34	8900.95	10504.6		8.13	1554.04	2534.27	3514.49	446.012	619.054	792.097		10.09	259.409	386.073	512.736	231.352	410.352	589.352
10.27	1.89141	122.92	243.948	6439.8	7942.05	9444.3		8.28	1833.26	2521.24	3209.23	450.294	669.058	887.823		10.27	245.2	372.981	500.762	222.14	352.989	483.838
10.46	-8.1619	169.423	347.007	6973.57	8112.56	9251.54		8.43	1797.46	2516.04	3234.62	288.434	475.367	662.3		10.46	237.041	364.547	492.052	218.54	375.957	533.374
10.65	20.1728	149.948	279.724	7125.73	8494.98	9864.23		8.58	1198.34	1990.76	2783.18	316.95	400.624	484.297		10.65	227.043	364.522	502.002	225.476	338.574	451.672
10.84	13.6534	143.592	273.53	6976.66	8087.69	9198.72		8.74	1153.12	1867.46	2581.79	226.099	352.024	477.948		10.84	242.266	387.988	533.709	193.616	323.504	453.392
11.04	0.377818	126.896	253.415	5826.65	7044.94	8263.23		8.9	1153.05	1661.91	2170.77	197.163	290.254	383.345		11.04	235.472	375.719	515.966	200.217	307.752	415.287
11.24	-12.9497	86.2304	185.41	6370.2	7200.69	8031.17		9.06	713.809	1252.55	1791.29	189.937	336.105	482.272		11.24	204.511	338.593	472.675	212.138	346.819	481.5
11.44	16.172	115.073	213.973	5922.42	6957.36	7992.31		9.22	742.72	1305.74	1868.76	215.212	311.972	408.732		11.44	178.286	309.313	440.34	134.942	256.578	378.215
11.65	-61.7152	78.3578	218.431	5564.39	6465.13	7365.86		9.39	547.863	1103.68	1659.5	168.593	253.829	339.064		11.65	186.141	303.982	421.824	140.627	249.128	357.629
11.86	38.5276	61.7944	85.0612	5360.94	6300.48	7240.03		9.56	606.507	1080.11	1553.71	183.938	250.864	317.79		11.86	155.13	270.46	385.789	207.804	292.329	376.854
12.08	9.31214	119.966	230.62	5132.31	5890.34	6648.37		9.73	722.155	1124.87	1527.58	69.5192	157.045	244.57		12.08	181.306	276.138	370.97	136.102	234.765	333.428
12.3	65.6878	157.533	249.378	4793.11	5668.32	6543.54		9.91	789.768	1082.6	1375.43	138.102	244.628	351.155		12.3	164.86	253.74	342.62	144.317	243.33	342.343
12.52	36.0667	111.451	186.836	4418.81	5149.87	5880.93		10.09	644.246	864.187	1084.13	107.753	150.432	193.111		12.52	221.945	308.887	395.829	173.99	237.279	300.567
12.75	-11.7847	106.851	225.486	3997.2	4744.88	5492.57		10.27	449.229	690.05	930.87	96.3567	156.766	217.176		12.75	159.51	280.028	400.547	95.9223	203.771	311.62
12.98	37.7563	114.567	191.378	3642.18	4351.29	5060.4		10.46	489.132	725.594	962.056	100.131	173.541	246.951		12.98	198.621	260.74	322.86	102.768	171.712	240.657
13.22	-19.827	81.0274	181.882	3228.04	3793.6	4359.15		10.65	518.401	810.214	1102.03	72.5855	104.793	137		13.22	165.39	252.67	339.95	75.649	141.401	207.153
13.46	26.732	116.814	206.897	2966.2	3475.62	3985.03		10.84	412.539	763.767	1114.99	81.4221	127.658	173.893		13.46	186.338	260.785	335.232	75.5077	124.437	173.366
13.7	19.5469	138.965	258.383	2927.12	3405.36	3883.61		11.04	427.598	655.671	883.744	87.2103	138.652	190.094		13.7	199.339	261.693	324.047	71.6012	156.381	241.161
13.95	-15.9856	97.828	211.642	2618.7	3117.32	3615.94		11.24	267.99	532.167	796.344	92.7879	159.257	225.726		13.95	122.667	215.86	309.053	80.2666	136.463	192.66
14.2	40.9024	104.009	167.116	2336.77	2762.52	3188.27		11.44	211.917	502.662	793.407	27.6316	114.086	200.54		14.2	128.567	224.791	321.015	73.3213	128.189	183.057
14.46	18.6384	76.3156	133.993	1981.03	2511.71	3042.39		11.65	309.986	543.407	776.828	43.1729	94.8916	146.61		14.46	141.734	215.155	288.577	62.8088	118.073	173.336
14.72	83.7783	140.61	197.443	1674.97	2132.26	2589.56		11.86	227.504	491.114	754.725	69.1017	103.591	138.08		14.72	142.933	247.811	352.689	56.1837	130.609	205.035
14.99	59.49	90.7554	122.021	1821.55	2137.54	2453.52		12.08	272.847	451.717	630.586	57.4241	99.3968	141.37		14.99	148.209	214.612	281.015	30.5733	82.0835	133.594
15.26	24.8601	107.253	189.645	1448.79	1772.58	2096.37		12.3	273.294	460.311	647.327	43.2796	102.724	162.168		15.26	134.032	226.089	318.147	66.0659	100.586	135.107
15.54	-11.3458	85.3338	182.013	1228.23	1590.82	1953.4		12.52	277.464	445.423	613.381	3.82139	70.272	136.723		15.54	128.451	207.628	286.806	47.7876	83.2499	118.712
15.82	-15.0545	89.667	194.389	1080.11	1425.02	1769.93		12.75	284.287	450.235	616.182	34.8752	72.9748	111.074		15.82	158.187	216.858	275.529	64.5037	111.436	158.368
16.11	37.962	84.6714	131.381	994.904	1246.04	1497.18		12.98	204.059	357.665	511.271	47.0932	75.8216	104.55		16.11	160.648	229.62	298.591	42.4627	87.2697	132.077
16.4	-39.4943	60.6104	160.715	938.384	1198.05	1457.72		13.22	207.044	350.534	494.023	64.3674	97.8716	131.376		16.4	106.04	179.076	252.111	50.3294	94.0597	137.79
16.7	36.2274	90.738	145.249	824.111	1013.58	1203.06		13.46	188.581	307.225	425.869	7.46687	76.2284	144.99		16.7	132.037	195.787	259.537	41.8286	80.8293	119.83
17	-21.3602	90.0378	201.436	706.106	905.289	1104.47		13.7	241.135	353.755	466.375	9.15453	77.4516	145.749		17	109.124	168.285	227.445	52.9208	81.891	110.861
17.31	24.9782	90.6156	156.253	665.641	869.266	1072.89		13.95	183.672	318.891	454.11	29.3937	64.9184	100.443		17.31	134.906	199.45	263.994	25.515	65.6663	105.818
17.62	20.968	74.066	127.164	544.606	710.255	875.905		14.2	178.27	297.322	416.374	54.3153	69.1268	83.9383		17.62	114.8	162.6	210.4	23.5339	76.7535	129.973
17.94	-11.3571	91.3898	194.137	418.242	588.287	758.333		14.46	195.187	308.944	422.7	35.9884	54.2298	72.4712		17.94	125.994	181.673	237.353	9.9501	57.0997	104.249
18.27	42.1545	100.13	158.106	381.533	546.786	712.039		14.72	155.446	292.948	430.45	30.2925	43.3086	56.3247		18.27	147.042	186.251	225.461	27.1271	75.3161	123.505
18.6	30.1718	87.3274	144.483	369.985	535.926	701.867		14.99	198.429	292.236	386.042	25.6806	74.3326	122.985		18.6	97.9244	152.603	207.281	39.6675	70.1733	100.679
18.94	8.22304	63.842	119.461	308.303	431.021	553.739		15.26	118.136	224.075	330.013	29.1504	71.3368	113.523		18.94	93.6458	161.56	229.474	14.6555	47.3677	80.08
19.28	-23.1935	51.1924	125.578	303.031	404.521	506.01		15.54	151.597	267.69	383.782	28.9124	76.9282	124.944		19.28	102.037	151.105	200.173	33.2767	56.8677	80.4587
19.63	8.22137	52.5662	96.911	292.013	430.835	569.656		15.82	137.607	238.048	338.488	19.3398	44.239	69.1382		19.63	91.54	151.445	211.351	13.0833	39.8169	66.5506
19.99	2.59692	66.2068	129.817	255.025	339.394	423.762		16.11	151.968	249.25	346.532	17.4177	39.7766	62.1355		19.99	96.7425	132.467	168.192	34.2709	67.3146	100.358
20.35	-21.1995	42.9882	107.176	173.394	298.192	422.991		16.4	141.535	264.7	387.866	16.7804	34.4454	52.1104		20.35	96.1614	139.216	182.27	25.9292	53.4615	80.9937
20.72	-8.98898	51.247	111.483	162.663	249.332	336.002		16.7	165.202	233.833	302.465	2.2654	27.8924	53.5194		20.72	89.1069	133.601	178.095	17.8095	47.2749	76.7404
21.1	16.2569	54.5052	92.7535	162.856	254.54	346.224		17	138.812	235.408	332.003	40.4727	54.7976	69.1225		21.1	86.6072	124.542	162.476	22.9473	49.3332	75.7191
21.48	19.3965	49.3502	79.3039	155.556	235.983	316.41		17.31	123.62	188.206	252.792	19.6758	43.4962	67.3166		21.48	70.2852	113.877	157.47	19.6997	43.7679	67.836
21.87	-13.8335	41.8324	97.4983	161.808	228.62	295.432		17.62	155.885	223.653	291.422	22.898	42.506	62.114		21.87	59.6165	111.079	162.542	27.081	44.2551	61.4291
22.27	17.2505	48.875	80.4995	132.998	195.713	258.429		17.94	66.4711	175.832	285.194	30.4895	35.462	40.4345		22.27	60.1141	98.6614	137.209	17.4947	39.3644	61.2341
22.67	18.8518	54.162	89.4722	105.992	183.379	260.766		18.27	86.097	190.659	295.221	30.3651	43.9364	57.5077		22.67	69.682	100.258	130.834	13.9431	44.4712	74.9993
23.08	-6.98931	34.2146	75.4185	117.423	173.256	229.089		18.6	136.79	215.847	294.904	14.4793	37.2594	60.0395		23.08	72.6719	102.133	131.594	19.0092	35.8127	52.6162
23.5	14.3588	51.478	88.5972	96.5682	156.076	215.583		18.94	117.264	186.586	255.909	30.8106	45.0832	59.3558		23.5	65.8414	104.915	143.988	20.5925	39.3859	58.1792
23.93	18.5191	54.6108	90.7025	92.358	166.832	241.306		19.28	109.128	183.641	258.155	25.2395	41.993	58.7465		23.93	59.0901	92.1719	125.254	13.6836	39.5641	65.4445
24.36	6.25104	38.801	71.351	61.0883	114.032	166.976		19.63	62.9665	133.759	204.552	15.1524	30.6568	46.1612		24.36	50.384	73.3014	96.2188	13.2646	27.6161	41.9676
24.8	6.86005	45.6476	84.4352	59.0586	126.574	194.09		19.99	78.0147	157.481	236.946	9.46507	17.2092	24.9533		24.8	74.6764	100.362	126.047	11.4052	30.4541	49.503
25.25	-7.2449	27.0532	61.3513	77.2145	130.16	183.105		20.35	70.6377	149.036	227.434	3.38961	28.0428	52.696		25.25	55.572	80.7944	106.017	10.7589	30.1497	49.5406
25.71	10.8512	42.0604	73.2696	74.7193	125.53	176.341		20.72	58.0624	119.466	180.869	4.58879	28.6512	52.7136		25.71	48.7114	72.7286	96.7458	12.0569	28.7101	45.3634
26.18	26.4155	50.5066	74.5977	63.7463	119.431	175.116		21.1	89.4085	139.296	189.183	10.7066	26.2844	41.8622		26.18	44.5826	73.2242	101.866	7.96081	22.0969	36.2329
26.66	17.3209	42.1502	66.9795	56.3367	114.015	171.694		21.48	81.8173	137.576	193.335	11.8275	20.1416	28.4557		26.66	45.7275	70.8572	95.987	3.89497	26.5731	49.2513
27.14	-3.72073	28.501	60.7227	75.0662	131.06	187.054		21.87	59.9685	131.88	203.791	11.4671	17.8434	24.2197		27.14	36.175	69.6308	103.087	7.69731	19.9727	32.248
27.63	7.65453	29.6694	51.6843	66.3698	111.387	156.405		22.27	56.1357	108.913	161.691	5.61731	15.502	25.3867		27.63	38.2041	58.4701	78.7362	10.149	23.5745	37
28.13	5.65655	35.951	66.2455	54.7735	110.615	166.455		22.67	63.9053	104.297	144.688	10.368	20.527	30.686		28.13	37.4011	72.3131	107.225	12.3982	27.5432	42.6882
28.64	-0.905292	24.8458	50.5969	86.5412	125.909	165.276		23.08	65.9542	118.438	170.922	4.55519	20.487	36.4188		28.64	32.0191	60.14	88.2609	5.05251	18.3431	31.6336
29.16	11.8854	37.9644	64.0434	51.7322	89.6936	127.655		23.5	68.8107	114.629	160.446	14.3231	21.2694	28.2157		29.16	13.7232	45.5841	77.4451	7.93709	23.6644	39.3917
29.69	12.5886	31.624	50.6594	65.6088	111.805	158		23.93	54.2595	104.148	154.037	12.5401	22.5872	32.6343		29.69	32.2955	55.3641	78.4327	5.55116	17.9543	30.3574
30.23	4.75666	24.1756	43.5945	61.7697	109.877	157.984		24.36	55.8167	109.624	163.43	0.569367	12.4812	24.393		30.23	31.291	49.7933	68.2956	8.02983	26.1929	44.356
30.78	12.5579	21.4678	30.3777	70.3281	98.9491	127.57		24.8	62.3742	112.063	161.753	12.9632	23.5964	34.2296		30.78	25.7669	48.922	72.0771	2.13404	17.0639	31.9937
31.34	-8.26154	18.0868	44.4351	65.987	99.8748	133.763		25.25	67.9543	93.0138	118.073	-6.11821	17.963	42.0442		31.34	17.8187	43.2054	68.5922	13.4004	27.9386	42.4768
31.91	27.0687	40.8066	54.5445	69.8033	106.292	142.781		25.71	37.8766	83.6507	129.425	10.4429	22.605	34.7671		31.91	29.11	46.5944	64.0787	5.35538	19.6493	33.9431
32.49	10.3669	23.3636	36.3603	53.2835	86.502	119.721		26.18	78.8391	108.285	137.73	6.57658	16.206	25.8354		32.49	25.9809	45.6657	65.3504	6.73906	18.1752	29.6113
33.08	3.48865	21.3576	39.2266	52.3224	98.5467	144.771		26.66	58.1134	98.4601	138.807	11.3596	18.7936	26.2276		33.08	14.0447	38.3755	62.7063	8.99919	19.0573	29.1153
33.68	5.18722	23.539	41.8908	68.6039	98.6812	128.758		27.14	35.6931	80.5496	125.406	0.768353	13.1436	25.5188		33.68	28.4261	42.3658	56.3055	3.07202	14.5667	26.0613
34.29	8.87559	18.8734	28.8712	61.1486	85.715	110.282		27.63	37.6307	83.8279	130.025	-2.3586	10.9336	24.2258		34.29	26.3029	41.8735	57.4441	3.73119	15.2614	26.7916
34.91	4.64633	25.8498	47.0533	56.3286	96.2827	136.237		28.13	48.4327	79.1689	109.905	1.87989	12.1788	22.4777		34.91	23.7118	32.0692	40.4267	4.78586	17.1796	29.5733
35.55	3.80584	35.1534	66.501	54.4972	96.5522	138.607		28.64	52.3879	79.5034	106.619	7.03721	13.302	19.5668		35.55	24.5486	38.8387	53.1289	7.23701	13.6269	20.0167
36.19	1.42014	25.1808	48.9415	61.762	88.3557	114.949		29.16	42.4813	72.1726	101.864	-0.655041	7.7782	16.2114		36.19	16.2494	32.7665	49.2836	1.86358	13.0129	24.1622
36.85	-2.34432	19.7026	41.7495	50.0482	79.9304	109.813		29.69	32.6454	56.9416	81.2378	2.47875	13.0148	23.5508		36.85	19.1141	28.9446	38.7751	4.83813	14.6398	24.4415
37.52	9.34089	22.4188	35.4967	68.9082	90.6731	112.438		30.23	36.4154	75.0468	113.678	3.49776	6.2498	9.00184		37.52	16.1667	33.2232	50.2797	7.68416	16.5078	25.3314
38.2	3.99082	17.5332	31.0756	60.9836	87.0333	113.083		30.78	8.97912	49.7599	90.5407	3.89672	7.3164	10.7361		38.2	16.7191	33.7414	50.7637	5.93296	14.1295	22.326
38.89	8.26434	18.3042	28.3441	50.2085	77.0437	103.879		31.34	34.3714	57.5891	80.8069	-0.631173	7.4752	15.5816		38.89	10.2245	23.0015	35.7785	6.74445	17.3379	27.9314
39.6	7.86772	21.3038	34.7399	45.3512	68.747	92.1427		31.91	33.7082	58.4709	83.2335	6.30725	14.5056	22.704		39.6	12.3598	24.3475	36.3352	3.5349	13.3226	23.1103
40.32	10.0378	17.957	25.8762	57.3483	79.9476	102.547		32.49	42.3331	68.6139	94.8946	-1.4026	10.4398	22.2822		40.32	7.264	19.1938	31.1236	1.57753	11.9487	22.3198
41.05	4.50391	23.4266	42.3493	46.8745	73.5252	100.176		33.08	25.1465	49.0978	73.0491	2.36914	7.771	13.1729		41.05	12.1412	26.3074	40.4735	7.9669	14.1985	20.4302
41.79	8.48206	18.2454	28.0087	47.6394	75.6247	103.61		33.68	23.63	48.9375	74.245	1.95682	4.5278	7.09878		41.79	9.20696	17.9534	26.6998	2.31522	13.7802	25.2452
42.55	8.03965	20.2904	32.5412	46.571	72.2262	97.8814		34.29	28.9761	49.3087	69.6413	6.19999	9.1598	12.1196		42.55	16.4999	27.2864	38.0729	6.20193	13.8039	21.4059
43.32	2.68591	12.121	21.5561	52.6847	74.8291	96.9734		34.91	11.5775	43.4462	75.315	6.29931	11.1	15.9007		43.32	12.4809	22.3468	32.2126	1.5615	12.2331	22.9046
44.11	3.16096	16.3966	29.6322	44.8582	64.9463	85.0343		35.55	19.2797	48.1564	77.0331	3.34716	9.3762	15.4052		44.11	6.33541	15.5902	24.845	3.69575	12.0591	20.4224
44.91	3.10265	14.0368	24.971	40.5305	66.646	92.7616		36.19	20.2553	41.917	63.5787	2.25073	9.4856	16.7205		44.91	4.4682	15.6547	26.8412	2.47976	8.3534	14.227
45.73	-0.2106	6.9416	14.0938	36.4865	59.7807	83.0749		36.85	16.9232	40.0923	63.2614	3.02441	5.3746	7.72479		45.73	6.48406	16.1445	25.8049	4.17257	12.0421	19.9116
46.56	0.715548	12.1494	23.5833	39.0197	58.0165	77.0133		37.52	9.34806	32.3699	55.3918	-4.98477	3.7726	12.53		46.56	7.76736	19.7384	31.7095	3.86881	9.98453	16.1003
47.4	-2.60037	11.9346	26.4696	32.8731	56.2944	79.7158		38.2	14.2569	35.8061	57.3552	-1.68157	6.8982	15.478		47.4	5.37041	15.4838	25.5972	2.68973	7.90653	13.1233
48.26	9.19175	16.7552	24.3186	36.2677	65.6363	95.0048		38.89	9.90734	36.3497	62.7921	-0.424763	3.9274	8.27956		48.26	6.78049	15.8818	24.9831	0.249979	10.4713	20.6926
49.14	7.26571	22.4804	37.6951	35.0491	66.3694	97.6898		39.6	1.68459	28.7217	55.7588	-3.01164	2.7644	8.54044		49.14	14.172	18.7318	23.2915	-0.219153	9.08747	18.3941
50.03	-1.06635	11.8636	24.7936	43.8526	71.0949	98.3372		40.32	8.74774	34.4082	60.0687	-0.606269	7.1774	14.9611		50.03	5.03858	14.7922	24.5459	3.4408	11.4355	19.4303
50.94	-0.920002	12.198	25.316	43.7511	61.9629	80.1747		41.05	9.51791	26.9876	44.4574	-1.78969	5.0918	11.9733		50.94	7.40197	12.6277	17.8534	2.83853	9.44187	16.0452
51.86	1.97688	9.2002	16.4235	39.1554	59.4771	79.7988		41.79	16.3822	37.5634	58.7445	1.18852	8.7188	16.2491		51.86	5.51024	15.1	24.6898	3.18476	10.3031	17.4214
52.8	3.50989	12.4148	21.3197	41.8994	65.2106	88.5218		42.55	9.29594	25.9046	42.5132	1.05576	5.451	9.84624		52.8	4.20392	14.5471	24.8903	2.00745	9.33153	16.6556
53.76	0.1031	10.1726	20.2421	41.2912	62.5337	83.7763		43.32	7.38412	23.8774	40.3707	3.1739	5.4852	7.7965		53.76	6.1621	14.1854	22.2087	4.13599	7.86867	11.6013
54.74	4.26315	12.8074	21.3516	44.2565	70.0913	95.9262		44.11	15.6203	34.2816	52.9429	1.0715	6.163	11.2545		54.74	4.0932	11.9241	19.7551	2.99913	9.18093	15.3627
55.73	-8.81674	4.3546	17.5259	42.5181	61.0483	79.5785		44.91	2.70159	25.5866	48.4716	-2.36258	5.567	13.4966		55.73	3.84243	13.6252	23.4079	1.23575	6.16367	11.0916
56.74	1.8252	13.8082	25.7912	38.644	54.4353	70.2265		45.73	10.3419	23.4102	36.4785	0.97161	7.3664	13.7612		56.74	1.29475	8.54306	15.7914	2.31893	7.37967	12.4404
57.77	-0.474222	10.8258	22.1258	29.9719	49.0531	68.1343		46.56	15.7224	28.7879	41.8533	1.53566	4.8772	8.21874		57.77	7.21317	13.2698	19.3265	-0.14472	6.01973	12.1842
58.82	5.97071	11.378	16.7853	49.2152	66.2433	83.2714		47.4	9.15776	30.1955	51.2332	-2.2113	9.245	20.7013		58.82	5.34845	13.0481	20.7477	-1.53622	6.27627	14.0888
59.89	3.94057	11.24	18.5394	43.5628	64.4738	85.3847		48.26	5.67269	17.0753	28.4779	2.15784	10.0176	17.8774		59.89	3.37726	10.8873	18.3974	2.98974	9.87273	16.7557
60.98	3.07166	12.0118	20.9519	22.9095	51.054	79.1985		49.14	9.18525	24.544	39.9028	-1.75988	2.744	7.24788		60.98	5.28091	14.4116	23.5423	3.10695	8.61087	14.1148
62.08	-0.305567	10.0388	20.3832	33.6419	56.4567	79.2715		50.03	15.9435	29.9824	44.0213	-0.479644	2.7688	6.01724		62.08	2.93802	7.28994	11.6419	-1.12484	5.99767	13.1202
63.21	-1.45933	5.8494	13.1581	35.17	59.9513	84.7325		50.94	9.36866	22.2792	35.1898	0.240723	6.2722	12.3037		63.21	0.895465	7.32787	13.7603	4.31953	8.6072	12.8949
64.36	2.79136	8.8914	14.9914	39.9665	65.0273	90.0881		51.86	4.2729	18.4816	32.6902	7.00359	9.9292	12.8548		64.36	5.54355	11.3503	17.1571	1.20392	6.7354	12.2669
65.52	3.59604	6.6296	9.66316	27.1743	54.2017	81.2292		52.8	2.71416	21.4571	40.2	0.610015	5.9448	11.2796		65.52	0.201298	8.66775	17.1342	1.5195	11.8669	22.2144
66.71	6.45185	10.2458	14.0397	26.8842	54.2926	81.701		53.76	2.55863	16.5102	30.4618	-0.778057	2.247	5.27206		66.71	5.80556	11.4764	17.1473	-1.76927	5.40327	12.5758
67.93	-4.47889	10.8182	26.1153	33.5391	59.8603	86.1816		54.74	8.51879	19.4427	30.3666	-2.47616	3.0456	8.56736		67.93	1.412	8.54931	15.6866	2.13908	8.7636	15.3881
69.16	1.7428	17.873	34.0032	16.9568	51.0592	85.1616		55.73	9.44343	19.1014	28.7593	-0.898007	2.9192	6.73641		69.16	2.18614	8.22969	14.2732	0.400746	6.53827	12.6758
70.41	-0.817068	6.406	13.6291	26.8325	47.7011	68.5697		56.74	10.9583	24.3384	37.7184	1.47136	5.1342	8.79704		70.41	2.76979	7.85475	12.9397	-0.768512	3.80833	8.38518
71.69	1.84262	5.8994	9.95618	39.1302	65.317	91.5039		57.77	1.30823	13.1808	25.0533	0.62948	7.0332	13.4369		71.69	2.31158	8.063	13.8144	0.64274	6.5886	12.5345
72.99	2.59366	7.5792	12.5647	33.8259	60.706	87.5862		58.82	5.50328	13.1249	20.7466	-1.05902	0.473	2.00502		72.99	0.808556	5.85769	10.9068	1.65451	5.06393	8.47336
74.32	-6.43178	2.3334	11.0986	30.2188	55.2792	80.3397		59.89	5.01395	13.4681	21.9223	-1.36967	2.3596	6.08887		74.32	3.07818	7.73294	12.3877	1.81264	8.29693	14.7812
75.67	1.35514	7.4176	13.4801	29.1357	58.173	87.2103		60.98	2.86501	11.4824	20.0998	-1.54621	5.2006	11.9474		75.67	1.12845	6.56613	12.0038	1.6907	5.27187	8.85304
77.04	-3.19705	5.1268	13.4506	42.4212	65.542	88.6628		62.08	6.04425	17.2224	28.4006	-2.15651	5.3116	12.7797		77.04	0.335366	6.45488	12.5744	2.05737	6.53813	11.0189
78.44	1.36641	6.169	10.9716	33.9647	67.9378	101.911		63.21	2.36026	14.88	27.3997	-1.50477	1.8832	5.27117		78.44	1.9144	6.303	10.6916	3.08242	8.04053	12.9987
79.86	-3.74882	7.198	18.1448	31.4119	64.6802	97.9485		64.36	-2.40539	6.91671	16.2388	-0.610609	7.7574	16.1254		79.86	2.05878	7.58044	13.1021	2.45177	7.14967	11.8476
81.31	0.692155	7.2072	13.7222	38.4796	67.6646	96.8496		65.52	2.41668	14.0866	25.7566	0.57933	7.3424	14.1055		81.31	0.11772	6.60137	13.085	2.10887	7.54887	12.9889
82.79	2.89489	6.1452	9.39551	29.759	61.927	94.0951		66.71	2.43844	12.1735	21.9086	-1.8436	2.8718	7.5872		82.79	1.99655	7.4105	12.8244	-0.318564	5.45287	11.2243
84.29	1.74348	4.707	7.67052	49.6382	84.003	118.368		67.93	2.51013	11.9489	21.3877	0.212003	5.7482	11.2844		84.29	1.53011	5.98031	10.4305	1.15338	8.28507	15.4168
85.82	3.31787	6.5954	9.87293	36.1692	74.7057	113.242		69.16	0.29966	8.31107	16.3225	-0.432095	5.7454	11.9229		85.82	2.42249	6.483	10.5435	0.114531	6.64847	13.1824
87.38	-1.4249	4.1236	9.6721	51.496	72.111	92.726		70.41	2.49629	14.057	25.6177	2.72178	11.3628	20.0038		87.38	0.819579	7.47394	14.1283	-0.207522	4.2802	8.76792
88.96	1.90508	8.473	15.0409	52.532	81.059	109.586		71.69	1.232	11.0314	20.8309	-2.09068	10.7254	23.5415		88.96	2.07298	6.94475	11.8165	1.45022	6.41127	11.3723
90.58	-0.0152836	2.2952	4.60568	56.9535	86.3786	115.804		72.99	1.59906	11.5309	21.4628	1.80245	9.8452	17.8879		90.58	0.615627	4.80912	9.00262	0.926951	5.21153	9.49612
92.22	3.43076	8.933	14.4352	50.6756	76.1351	101.595		74.32	3.30598	13.6739	24.0419	3.8646	14.3288	24.793		92.22	1.76558	6.63994	11.5143	-0.467597	5.22567	10.9189
93.9	-1.18857	6.8248	14.8382	74.4095	104.911	135.412		75.67	2.11773	9.65179	17.1858	1.69078	8.0656	14.4404		93.9	2.12611	7.25188	12.3776	0.568607	6.2508	11.933
95.6	3.02272	10.486	17.9493	70.2102	97.769	125.328		77.04	5.3428	13.0534	20.7639	-3.59371	4.8456	13.2849		95.6	2.08228	5.13762	8.19297	0.898173	5.5008	10.1034
97.34	1.52694	4.9904	8.45386	68.5681	114.478	160.388		78.44	3.93902	10.9655	17.992	0.701847	8.2244	15.747		97.34	2.96954	8.34006	13.7106	-0.240955	5.0618	10.3646
99.1	0.530494	3.5784	6.62631	77.2393	112.116	146.992		79.86	-2.93483	9.21693	21.3687	-3.31449	6.5988	16.5121		99.1	-0.259882	4.56519	9.39026	0.455143	4.52373	8.59232
100.9	-1.37977	3.3278	8.03537	82.8518	120.77	158.688		81.31	3.33599	13.0891	22.8422	0.0840892	20.6688	41.2535		100.9	0.861499	6.24825	11.635	0.24919	5.888	11.5268
102.74	0.213349	4.7754	9.33745	103.719	131.244	158.769		82.79	0.833232	11.6774	22.5215	-9.68363	9.0904	27.8644		102.74	0.998887	5.09756	9.19624	-0.0244294	4.39287	8.81016
104.6	-2.20959	4.1944	10.5984	104.046	142.552	181.058		84.29	-0.573625	8.8465	18.2666	8.44564	14.028	19.6104		104.6	1.09673	6.32287	11.549	1.23551	6.51153	11.7876
106.5	0.789398	2.2838	3.7782	126.376	159.684	192.992		85.82	1.84276	11.9155	21.9882	-0.261081	7.6272	15.5155		106.5	0.764768	4.05237	7.33998	2.96096	7.50473	12.0485
108.43	-1.04872	4.3284	9.70552	130.69	163.7	196.711		87.38	4.66358	11.2355	17.8074	-1.17706	4.3712	9.91946		108.43	4.10988	7.86988	11.6299	-0.311008	4.90033	10.1117
110.4	1.82434	4.9294	8.03446	157.859	190.162	222.465		88.96	1.44218	8.1075	14.7728	-1.29859	3.934	9.16659		110.4	3.03475	9.24481	15.4549	-0.835132	3.179	7.19313
112.4	-0.739619	3.7946	8.32882	169.821	198.873	227.924		90.58	0.635371	6.65014	12.6649	6.07616	10.3488	14.6214		112.4	1.72182	7.65594	13.5901	-0.262906	5.27027	10.8034
114.44	-0.152434	3.786	7.72443	165.474	207.244	249.015		92.22	0.668786	5.87864	11.0885	-0.51871	3.8418	8.20231		114.44	0.439872	3.29906	6.15825	0.355048	7.98547	15.6159
116.52	0.118067	4.8438	9.56953	192.734	236.663	280.593		93.9	0.627744	6.267	11.9063	3.7447	6.043	8.3413		116.52	1.74761	6.507	11.2664	-0.124245	4.9328	9.98985
118.64	0.111837	4.9934	9.87496	225.565	265.481	305.397		95.6	1.89922	6.16329	10.4274	1.48424	7.2098	12.9354		118.64	-1.80207	4.21744	10.2369	-1.3207	5.92347	13.1676
120.79	1.3212	5.449	9.5768	233.66	279.231	324.801		97.34	-0.72337	6.3065	13.3364	5.23262	9.5774	13.9222		120.79	-1.22995	3.412	8.05395	0.315447	8.01907	15.7227
122.98	1.9842	3.6072	5.2302	263.833	304.083	344.332		99.1	1.03603	6.06179	11.0875	6.53226	13.0888	19.6453		122.98	0.16726	3.32506	6.48286	1.132	5.97873	10.8255
125.21	2.01344	4.8878	7.76216	280.041	330.173	380.305		100.9	0.523309	6.82914	13.135	6.43102	20.1602	33.8894		125.21	0.327967	3.836	7.34403	0.493963	7.21193	13.9299
127.49	-0.0652767	1.4142	2.89368	289.279	334.509	379.74		102.74	1.42332	9.42086	17.4184	15.7764	25.3648	34.9532		127.49	-1.08714	5.04181	11.1708	-0.870907	5.39167	11.6542
129.8	-0.804442	3.273	7.35044	312.504	351.906	391.309		104.6	0.0474041	6.09779	12.1482	26.629	49.6154	72.6018		129.8	0.872348	6.41719	11.962	0.85596	6.2028	11.5496
132.16	1.50599	3.867	6.22801	282.04	316.533	351.025		106.5	-0.47019	7.93371	16.3376	49.111	64.9272	80.7434		132.16	-1.15159	4.88931	10.9302	-1.39181	4.31693	10.0257
134.56	-0.298097	3.8938	8.0857	226.727	274.02	321.312		108.43	1.61883	6.28271	10.9466	68.2774	90.7568	113.236		134.56	1.54464	4.34962	7.15461	0.511956	7.48833	14.4647
137	0.53977	2.695	4.85023	204.257	239.129	274.001		110.4	1.1962	4.53814	7.88008	84.2044	124.734	165.264		137	-0.743442	4.68094	10.1053	-0.646794	6.514	13.6748
139.49	0.0550351	1.7854	3.51576	156.991	193.16	229.329		112.4	-3.80229	4.07286	11.948	128.606	146.703	164.799		139.49	-1.11029	5.70087	12.512	-1.29363	4.57887	10.4514
142.02	-0.908968	3.6146	8.13817	102.65	139.551	176.451		114.44	0.66166	4.61221	8.56277	128.004	154.446	180.887		142.02	1.41357	4.5085	7.60343	-0.485691	4.49227	9.47022
144.6	-0.339351	3.5704	7.48015	84.9267	105.445	125.963		116.52	-2.39551	3.82621	10.0479	134.581	163.862	193.144		144.6	0.0797136	3.60656	7.13341	-0.935328	4.00673	8.9488
147.22	-0.0602991	3.6358	7.3319	44.1019	62.982	81.862		118.64	-2.52789	4.29457	11.117	139.302	154.582	169.862		147.22	0.568221	3.41919	6.27015	-0.714423	4.482	9.67842
149.89	0.366225	3.1152	5.86418	30.7437	52.8023	74.8608		120.79	-0.271794	5.10529	10.4824	118.565	160.795	203.025		149.89	-0.24739	1.57638	3.40014	0.665195	6.16473	11.6643
152.61	-1.75324	1.4184	4.59004	22.1153	37.0131	51.911		122.98	-1.01425	4.44907	9.91239	96.9805	131.507	166.033		152.61	-1.6751	4.74344	11.162	0.545828	8.2846	16.0234
155.38	0.74385	2.2232	3.70255	11.8658	27.4254	42.985		125.21	-1.80772	5.26964	12.347	74.7686	98.2664	121.764		155.38	0.869127	5.02725	9.18537	-0.202828	7.78	15.7628
158.2	-1.41664	2.823	7.06264	9.29219	19.2899	29.2876		127.49	3.0845	5.80064	8.51678	62.9703	82.4348	101.899		158.2	0.230869	3.25406	6.27726	-2.20097	3.25907	8.7191
161.08	0.693668	3.4892	6.28473	-0.198554	8.66161	17.5218		129.8	0.407357	3.91879	7.43021	21.3072	48.9172	76.5272		161.08	-0.18885	4.63706	9.46297	-0.986421	4.98027	10.947
164	-0.426995	1.862	4.15099	8.33397	17.9968	27.6596		132.16	-0.520284	3.86514	8.25057	15.3078	25.3676	35.4274		164	-0.583411	3.93006	8.44354	-0.193137	6.38207	12.9573
166.98	-0.140003	0.3778	0.895603	4.06075	11.1317	18.2027		134.56	-0.672077	3.90571	8.48351	8.1366	13.3134	18.4902		166.98	0.201571	3.25025	6.29893	-0.144213	6.02567	12.1955
170.01	-1.64422	1.3302	4.30462	-0.311895	10.3996	21.1111		137	-0.779624	4.90471	10.5891	2.65649	7.4158	12.1751		170.01	-1.39723	3.13338	7.66398	2.16179	8.3052	14.4486
173.09	0.503631	3.103	5.70237	3.07168	11.2452	19.4188		139.49	-1.95877	3.67743	9.31363	-1.06633	3.4964	8.05913		173.09	-1.70798	3.67694	9.06186	-0.436397	4.98313	10.4027
176.24	-1.02886	1.7296	4.48806	1.89572	9.26222	16.6287		142.02	0.350665	4.20214	8.05362	-1.40055	3.6566	8.71375		176.24	0.448946	3.9635	7.47805	1.0424	8.93927	16.8361
179.43	-5.96896	0	5.96896	3.40233	10.6711	17.9399		144.6	-2.42691	2.97829	8.38348	-1.34028	3.6288	8.59788		179.43	-0.894354	3.80719	8.50873	-2.18125	3.478	9.13725
182.69	0.0030672	1.3568	2.71053	0.850429	12.958	25.0656		147.22	-3.10535	1.097	5.29935	-0.330072	5.0114	10.3529		182.69	0.162583	4.11113	8.05967	0.978882	5.71413	10.4494
186.01	-2.83654	3.1216	9.07974	2.97963	10.1031	17.2266		149.89	-1.31957	4.67764	10.6749	1.35868	4.49	7.62132		186.01	-0.747008	3.80012	8.34726	-0.858338	3.38127	7.62087
189.38	-15.0794	1.5284	18.1362	1.07923	8.97465	16.8701		152.61	-2.82841	3.53229	9.89299	-0.960845	2.7756	6.51204		189.38	-0.343471	4.24087	8.82522	-2.10588	4.2428	10.5915
192.82	-7.48383	0.7106	8.90503	3.80749	9.44696	15.0864		155.38	-0.832134	3.23936	7.31085	-0.158084	5.9568	12.0717		192.82	-0.529602	2.27719	5.08398	0.132491	4.28907	8.44564
196.32	-5.0841	2.1426	9.3693	2.32341	9.18235	16.0413		158.2	-0.618772	4.28143	9.18163	2.14348	4.7908	7.43812		196.32	0.0554091	1.93256	3.80972	-1.03713	3.54793	8.133
199.89	-10.6059	0.1484	10.9027	1.10516	9.69378	18.2824		161.08	0.121577	2.36736	4.61314	-1.46387	3.8478	9.15947		199.89	-0.138465	1.25269	2.64384	-1.11363	3.935	8.98363
203.51	-12.2478	0	12.2478	0.511839	6.60509	12.6983		164	-0.284616	1.88986	4.06433	-0.70103	4.0544	8.80983		203.51	0.38066	3.9475	7.51434	-0.253131	3.8052	7.86353
207.21	-20.7595	3.8626	28.4847	0.972589	7.78483	14.5971		166.98	0.516887	5.40979	10.3027	1.17383	7.2996	13.4254		207.21	0.0936039	3.96362	7.83365	-0.460345	3.13907	6.73848
210.97	-12.6485	2.3618	17.3721	0.0398491	6.8553	13.6708		170.01	-1.26772	2.36721	6.00215	1.59354	5.2244	8.85526		210.97	-0.725154	2.13456	4.99428	-1.11528	3.29167	7.69861
214.8	-13.3428	3.7718	20.8864	1.04322	9.18074	17.3183		173.09	-1.04573	1.66607	4.37787	-1.1642	5.249	11.6622		214.8	0.748794	4.69144	8.63408	-0.708512	3.05513	6.81878
218.7	-19.1726	1.9534	23.0794	-0.65015	7.00913	14.6684		176.24	-1.13939	3.19729	7.53396	1.71323	4.9934	8.27357		218.7	0.0291369	2.8435	5.65786	-0.570509	3.8068	8.18411
222.67	-17.8163	0.5002	18.8167	4.28939	9.4147	14.54		179.43	-1.91289	5.26671	12.4463	-0.34232	4.2638	8.86992		222.67	-0.731153	2.9555	6.64215	-1.35286	4.8936	11.1401
226.71	-24.9211	0.4888	25.8987	-0.219336	6.17504	12.5694		182.69	-1.50427	3.67443	8.85313	-0.344411	5.4398	11.224		226.71	-1.27883	2.83838	6.95558	0.771538	8.535	16.2985
230.82	-2.80785	1.6224	6.05265	0.982273	7.47013	13.958		186.01	-0.822324	1.74407	4.31047	-0.27452	3.4928	7.26012		230.82	-0.28911	3.36681	7.02274	8.48336	15.2829	22.0825
235.01	-28.7812	1.1362	31.0536	0.0881063	4.80487	9.52163		189.38	-0.631389	1.48821	3.60782	0.78083	7.1054	13.43		235.01	-0.122706	3.08519	6.29308	5.34611	13.3294	21.3127
239.28	-24.0159	1.5246	27.0651	1.30098	6.60991	11.9188		192.82	-1.78302	4.37436	10.5317	0.117045	5.1092	10.1014		239.28	-0.311614	3.47194	7.25549	9.11365	16.7379	24.3622
243.62	-19.4593	1.4694	22.3981	-0.912836	4.77774	10.4683		196.32	-2.64724	1.30493	5.25709	-1.39177	3.9014	9.19457		243.62	-0.769643	4.53881	9.84727	9.02597	17.242	25.458
248.05	-24.8609	2.4534	29.7677	-1.21279	5.15274	11.5183		199.89	-1.45958	2.54786	6.5553	-0.996373	4.0106	9.01757		248.05	-0.148032	2.48269	5.11341	13.8668	26.2346	38.6024
252.55	-31.2777	0	31.2777	-0.116097	6.58326	13.2826		203.51	-1.44724	0.938571	3.32438	1.84772	6.4622	11.0767		252.55	-1.07921	2.15031	5.37984	18.596	30.3856	42.1752
257.13	-22.417	0.5524	23.5218	0.00576155	4.735	9.46424		207.21	-2.84351	4.53171	11.9069	-2.70265	1.1646	5.03185		257.13	-1.81904	2.17981	6.17866	15.5459	30.0747	44.6034
261.8	-12.1263	1.1196	14.3655	0.919258	7.37391	13.8286		210.97	-1.93763	2.58121	7.10006	-1.31132	2.5358	6.38292		261.8	-0.520977	1.05475	2.63048	29.8937	42.0439	54.194
266.55	-18.9682	3.128	25.2242	-0.164311	5.27939	10.7231		214.8	-1.69048	2.09257	5.87562	-0.842431	2.1014	5.04523		266.55	1.31105	4.79281	8.27458	26.5744	40.4557	54.337
271.39	-29.8784	0.8388	31.556	1.27178	5.89683	10.5219		218.7	-1.14507	0.538643	2.22236	0.985595	3.2638	5.54201		271.39	-0.335636	3.17937	6.69439	17.6383	30.3443	43.0502
276.32	-21.9222	0.1214	22.165	-1.13788	2.51187	6.16162		222.67	-0.737992	0.666357	2.07071	-0.527482	1.1306	2.78868		276.32	-1.11138	2.62119	6.35376	14.6854	27.4885	40.2916
281.33	-34.1157	0	34.1157	-3.63927	3.25748	10.1542		226.71	-1.64172	3.08171	7.80515	-0.464067	5.2816	11.0273		281.33	0.310666	3.94231	7.57396	13.7014	20.2161	26.7308
286.44	-19.3445	3.8026	26.9497	0.734435	6.4603	12.1862		230.82	-1.9463	2.11814	6.18259	-1.15274	5.3078	11.7683		286.44	-0.193081	2.704	5.60108	7.28388	18.2151	29.1464
291.64	-20.4747	3.17	26.8147	0.694146	6.72761	12.7611		235.01	-0.249131	3.86779	7.9847	-1.88748	1.527	4.94148		291.64	-0.496818	4.79025	10.0773	2.26218	12.9572	23.6522
296.93	-17.9103	0.8944	19.6991	-1.48896	5.63513	12.7592		239.28	-1.14593	3.19714	7.54021	0.274805	1.8726	3.4704		296.93	0.0811482	3.37469	6.66823	2.95459	9.55193	16.1493
302.32	-11.6486	0	11.6486	-0.287642	5.07878	10.4452		243.62	-1.45848	2.87686	7.21219	0.328243	4.6848	9.04136		302.32	-0.379036	2.70131	5.78166	1.18063	6.79753	12.4144
307.81	-16.6748	0	16.6748	2.42968	8.37422	14.3188		248.05	-3.04026	4.38979	11.8198	-0.0891559	2.7998	5.68876		307.81	-0.641353	3.32825	7.29785	-2.41924	4.5584	11.536
313.4	-10.2765	0	10.2765	-0.933633	7.21591	15.3655		252.55	-2.45481	3.89543	10.2457	-1.77457	2.1542	6.08297		313.4	-1.01159	1.82906	4.66971	-0.709463	2.23027	5.17
319.08	-4.09302	2.6614	9.41582	-1.41844	3.62904	8.67652		257.13	-1.89622	0	1.89622	2.75142	7.5024	12.2534		319.08	-1.1193	2.72225	6.5638	1.92851	4.5254	7.12229
324.88	-10.7248	3.5696	17.864	-1.02718	6.358	13.7432		261.8	-1.83914	2.43171	6.70257	-0.210148	1.7804	3.77095		324.88	0.596285	3.666	6.73572	-0.775498	3.02893	6.83336
330.77	-6.22831	1.7956	9.81951	-0.624241	3.45104	7.52633		266.55	-3.37786	0.769357	4.91657	-2.21598	1.7924	5.80078		330.77	-0.332253	1.94556	4.22338	-0.190777	5.047	10.2848
336.78	-6.0584	0	6.0584	-1.09435	6.59726	14.2889		271.39	-2.62231	3.23743	9.09717	-1.94219	3.6094	9.16099		336.78	0.2844	3.68831	7.09223	-0.267787	3.92487	8.11752
342.89	-12.9562	0.9108	14.7778	-0.517019	5.21952	10.9561		276.32	-2.0232	1.0145	4.0522	-1.23777	2.7264	6.69057		342.89	-0.890524	1.99944	4.8894	0.156003	3.04	5.924
349.12	-8.20012	1.8334	11.8669	-1.12195	4.75004	10.622		281.33	-1.82723	1.51729	4.8618	-0.475736	5.4906	11.4569		349.12	-0.429753	2.87425	6.17825	1.34714	4.286	7.22486
355.45	-4.1251	0	4.1251	0.543752	6.24657	11.9494		286.44	-1.9305	0.789214	3.50893	-2.01679	1.8432	5.70319		355.45	-0.915518	1.16056	3.23664	-2.32181	3.7	9.72181
361.9	-4.7115	1.86	8.4315	-1.66342	3.56991	8.80325		291.64	-1.58033	3.27693	8.13419	0	0	0		361.9	-1.73562	2.328	6.39162	-0.977878	2.4848	5.94748
368.47	-9.20799	0.9378	11.0836	-0.733654	6.52696	13.7876		296.93	-1.59068	1.03157	3.65382	1.42431	6.5462	11.6681		368.47	-1.76672	3.23925	8.24522	0.54597	4.69327	8.84056
375.16	-1.60697	4.7214	11.0498	-2.36812	4.4077	11.1835		302.32	-2.39923	2.0895	6.57823	-0.695773	1.884	4.46377		375.16	-0.858223	2.96062	6.77947	-1.73123	3.15253	8.03629
381.97	-7.27508	0.9526	9.18028	-0.971223	3.89109	8.7534		307.81	-1.53659	1.55521	4.64702	-1.02383	2.8934	6.81063		381.97	-1.16502	1.78794	4.7409	-0.867718	3.49313	7.85398
388.91	-5.28302	0.9582	7.19942	-2.22205	1.6037	5.42944		313.4	-2.68128	1.57907	5.83942	-1.12532	0.9104	2.94612		388.91	-0.492259	3.00856	6.50938	0.123874	4.99593	9.86799
395.96	0	0	0	0.0330735	4.85287	9.67267		319.08	-3.22641	3.65407	10.5346	-0.23785	3.8558	7.94945		395.96	-0.314812	2.72831	5.77144	-0.315568	2.70507	5.7257
403.15	-3.31564	0	3.31564	-1.37859	3.60204	8.58268		324.88	-1.07416	1.57779	4.22973	-2.7477	0.9714	4.6905		403.15	-1.10772	1.83356	4.77485	-0.937789	4.11887	9.17552
410.47	-2.79512	1.9664	6.72792	-1.28026	3.05687	7.394		330.77	-0.373337	1.606	3.58534	0.747889	2.937	5.12611		410.47	-0.818005	1.53794	3.89388	-0.650008	3.0558	6.76161
417.92	-5.63507	0.9904	7.61587	-1.14197	4.18483	9.51163		336.78	-1.60386	1.62457	4.85301	-2.20834	0	2.20834		417.92	-0.950811	2.17238	5.29556	-1.15123	1.98087	5.11297
425.51	-4.93075	3.991	12.9127	-2.09407	3.14278	8.37964		342.89	-3.05743	3.19914	9.45571	-4.45246	0	4.45246		425.51	-1.54445	1.73256	5.00957	0.246871	3.328	6.40913
433.23	-3.53056	3.0138	9.55816	-0.249247	5.22809	10.7054		349.12	-3.35084	1.08886	5.52856	-1.47566	3.009	7.49366		433.23	0.465682	2.98319	5.50069	-2.09598	2.01287	6.12171
441.09	-1.43977	1.0138	3.46737	-1.83146	2.70487	7.2412		355.45	-1.70507	1.10579	3.91664	-2.2629	0	2.2629		441.09	-1.00155	1.26963	3.5408	-0.879036	2.36807	5.61517
449.1	-0.604633	0	0.604633	-1.82027	3.5383	8.89687		361.9	-1.52045	2.99707	7.5146	-0.481128	4.0776	8.63633		449.1	-1.29592	2.88475	7.06542	-0.700433	3.06973	6.8399
457.25	-0.236067	2.0644	4.36487	-0.566292	3.182	6.93029		368.47	-0.713511	0.920071	2.55365	-1.78832	1.0278	3.84392		457.25	-0.968063	0.322688	1.61344	0.0220231	4.10247	8.18291
465.55	-5.91844	1.0402	7.99884									-0.765498	2.0728	4.9111		465.55	-1.51025	1.62956	4.76937	-0.557605	2.1046	4.76681
474	-1.2949	1.0476	3.3901									-1.29194	1.0452	3.38234		474	-1.03725	1.31488	3.667	-0.797994	1.74833	4.29466
482.61	0.8798	0.8798	0.8798									-1.55262	3.1628	7.87822		482.61	-1.7334	1.32425	4.3819	-0.757652	3.174	7.10565
491.37	0.1796	0.1796	0.1796									-1.56488	3.189	7.94288		491.37	-1.00313	0.334375	1.67188	-1.37503	1.067	3.50903
500.29	-1.57937	3.2246	8.02857									4.28591	4.2894	4.29289		500.29	-1.06219	1.3465	3.75519	-0.626336	2.1524	4.93114
509.37	-2.6835	2.171	7.0255									0.281147	3.2446	6.20805		509.37	-1.18039	0.681312	2.54301	-1.52624	1.87233	5.2709
518.61	-2.13543	1.7276	5.59063									-2.36188	1.9108	6.18348		518.61	-3.03187	1.01063	5.05312	-3.98497	2.43133	8.84763
528.03	-1.49847	0.8936	3.28567									-1.07439	0.8692	2.81279		528.03	-0.857721	1.98494	4.8276	-1.23345	2.08007	5.39358
537.61	-0.276873	0.7496	1.77607									-0.222714	2.678	5.57871		537.61	0.230231	1.9265	3.62277	0.382897	1.87327	3.36364
