# Supplementary material for: Bubble-mediated generation of airborne nanoplastic particles
Source: Royal Society of Chemistry journal article supplement (doi:10.1039/d4em00124a), 2024-01-01
Supplement: d4em00124a3.xlsx [file d4em00124a3.xlsx]

## Sheet: Sheet1
Figure 2A	MilliQ	PSL 0.91 g m^-3	PSL 0.45 g m^-3		Figure 2B	PSL 0.91 g m^-3	PSL 0.73 g m^-3	PSL 0.54 g m^-3	PSL 0.36 g m^-3	PSL 0.18 g m^-3	PSL 0.09 g m^-3	MilliQ		Figure 2C				Figure 2D
Dp (nm)	dNdlogDp (cm^-3)	dNdlogDp (cm^-3)	dNdlogDp (cm^-3)		Dp (nm)	dNdlogDp (cm^-3)	dNdlogDp (cm^-3)	dNdlogDp (cm^-3)	dNdlogDp (cm^-3)	dNdlogDp (cm^-3)	dNdlogDp (cm^-3)	dNdlogDp (cm^-3)		Legend	Number concentration in water [cm^-3]	Number concentration in air [cm^-3]		Legend	Number concentration in water [cm^-3]	Number concentration in air [cm^-3]	Emission rate [s^-1]
9.91	221.508	11473.4	494.216		7.99	9259.98	9539.78	8913.97	7195.43	6713.06	3128.73	2715.06		103nm, this study (exp6)	167000000	12.52		103nm, this study	167000000	12.52	1867.94
10.09	217.189	11386.6	619.054		8.13	9157.04	9173.59	8900.95	7296.71	6394.6	3278.46	2534.27			300000000	19.445			300000000	19.445	2901.13
10.27	156.379	11389.2	669.058		8.28	9941.75	9889.52	7942.05	6750.15	5923.2	2704.1	2521.24			651000000	31.42			651000000	31.42	4687.75
10.46	285.725	11384.4	475.367		8.43	9496.92	9313.6	8112.56	7139.28	5886.63	2807.16	2516.04			1010000000	44.76			1010000000	44.76	6678.04
10.65	169.976	11200.4	400.624		8.58	9489.55	9730.21	8494.98	6648.87	5268.55	2675.64	1990.76			1340000000	56.81			1340000000	56.81	8475.85
10.84	162.617	10590.4	352.024		8.74	10437.8	9539.24	8087.69	5883.1	4821.87	2264.14	1867.46			1710000000	71.99			1710000000	71.99	10740.7
11.04	154.035	10194.2	290.254		8.9	9623.47	8997.43	7044.94	6098.97	4224.35	2457.63	1661.91		269nm, this study (exp4)	42700000	3		269nm, this study	42700000	3	447.59
11.24	112.03	9669.51	336.105		9.06	9711.13	8756.54	7200.69	5465.76	4334.15	2178.08	1252.55		147nm, this study(exp1)	260000000	13		147nm, this study	260000000	13	1939.55
11.44	139.674	9428.32	311.972		9.22	9743.99	8600.73	6957.36	5362.92	3834	2011.91	1305.74		147 50drops (exp2)	520000000	30			520000000	30	4475.9
11.65	140.983	9111.65	253.829		9.39	9133.89	7729.81	6465.13	5156.62	3565.5	2058.88	1103.68		milliq (exp1)	0	0.98		147nm, 0.01g/kg, this study	260000000	25	3729.91
11.86	76.7524	8876.76	250.864		9.56	8582.92	7474.16	6300.48	4457.05	3447.48	1802.21	1080.11		147, this study (exp3a)	260000000	13		147nm, 0.1g/kg, this study	260000000	29	4326.7
12.08	170.016	8471.6	157.045		9.73	8452.34	7237.09	5890.34	4422.9	2880.57	1575.61	1124.87							0	1.08	161.132
12.3	164.342	7945.57	244.628		9.91	8504.6	6870.54	5668.32	3561.2	2659.57	1368.96	1082.6							0	0.98	146.213
12.52	150.729	7497.41	150.432		10.09	7790.61	6699.86	5149.87	3629.12	2487.6	1355.64	864.187						147, this study (exp3a)	260000000	13	1939.55
12.75	175.893	7055.73	156.766		10.27	7566.62	5764.57	4744.88	3104.35	2417.84	1361.64	690.05
12.98	150.691	6546.46	173.541		10.46	6879.79	5510.11	4351.29	2846.33	2144.37	1009.74	725.594
13.22	138.8	6165.54	104.793		10.65	6480.77	5427.77	3793.6	2528.9	1866.94	1010.58	810.214
13.46	139.023	5528.39	127.658		10.84	6704.44	4880.79	3475.62	2677.03	1731.56	910.6	763.767
13.7	173.577	5529.32	138.652		11.04	5822.6	4422.7	3405.36	2224.15	1602.29	873.39	655.671
13.95	126.141	5049.71	159.257		11.24	5598.02	4165.67	3117.32	2071.75	1434.93	819.635	532.167
14.2	124.103	4626.18	114.086		11.44	5093.87	4003.58	2762.52	1842.78	1379.2	694.719	502.662
14.46	94.879	4364.74	94.8916		11.65	4892.76	3573.61	2511.71	1797.24	1154.93	653.438	543.407
14.72	161.528	3650.73	103.591		11.86	4528.02	3285.15	2132.26	1641.82	1028.14	694.138	491.114
14.99	114.791	3487.22	99.3968		12.08	3836.86	2998.1	2137.54	1299.15	969.415	626.995	451.717
15.26	141.498	3260.55	102.724		12.3	3598.49	2740.78	1772.58	1073.13	1011.49	508.874	460.311
15.54	126.694	2695.24	70.272		12.52	3458.85	2388.31	1590.82	1066.17	786.875	507.185	445.423
15.82	125.633	2414.59	72.9748		12.75	2987.81	2031.18	1425.02	986.219	738.947	550.045	450.235
16.11	100.06	2163.83	75.8216		12.98	2758.37	1857.92	1246.04	980.365	801.355	457.509	357.665
16.4	99.686	1955.77	97.8716		13.22	2448	1796.31	1198.05	756.276	664.495	468.38	350.534
16.7	103.604	1583.66	76.2284		13.46	2203.08	1556.57	1013.58	830.732	547.363	429.365	307.225
17	132.304	1392.41	77.4516		13.7	1987.86	1425.26	905.289	671.932	583.609	422.863	353.755
17.31	128.239	1372.65	64.9184		13.95	1651.21	1271.33	869.266	633.228	545.809	441.973	318.891
17.62	93.742	1157.34	69.1268		14.2	1506.02	1186.5	710.255	587.263	486.95	355.741	297.322
17.94	132.923	858.328	54.2298		14.46	1427.21	999.727	588.287	571.718	461.917	335.139	308.944
18.27	118.722	867.187	43.3086		14.72	1225.2	950.478	546.786	395.944	491.968	310.066	292.948
18.6	111.377	725.216	74.3326		14.99	1155.54	821.732	535.926	432.571	421.964	273.051	292.236
18.94	87.1586	527.202	71.3368		15.26	864.542	702.272	431.021	397.337	343.935	289.186	224.075
19.28	88.3018	539.238	76.9282		15.54	941.755	641.295	404.521	339.05	387.997	251.846	267.69
19.63	77.434	465.031	44.239		15.82	801.565	582.079	430.835	291.229	365.444	253.496	238.048
19.99	95.7982	446.301	39.7766		16.11	699.028	526.449	339.394	312.736	260.247	245.783	249.25
20.35	76.9912	331.885	34.4454		16.4	623.577	486.418	298.192	301.942	270.514	212.849	264.7
20.72	84.4106	290.291	27.8924		16.7	570.275	452.829	249.332	231.703	296.075	227.097	233.833
21.1	74.3944	259.11	54.7976		17	521.233	410.097	254.54	249.589	239.411	233.26	235.408
21.48	66.3364	197.423	43.4962		17.31	409.936	312.856	235.983	205.517	233.693	219.861	188.206
21.87	60.6252	203.207	42.506		17.62	393.566	353.433	228.62	204.988	260.348	199.112	223.653
22.27	67.3028	169.252	35.462		17.94	366.526	324.035	195.713	213.235	249.024	162.318	175.832
22.67	79.048	169.252	43.9364		18.27	298.266	249.368	183.379	221.575	206.486	147.201	190.659
23.08	56.1546	141.259	37.2594		18.6	260.876	243.513	173.256	188.972	196.836	184.639	215.847
23.5	70.8128	128.155	45.0832		18.94	244.93	249.82	156.076	156.104	188.489	163.566	186.586
23.93	69.2626	91.9723	41.993		19.28	236.812	194.536	166.832	154.204	191.103	144.254	183.641
24.36	54.8022	94.4883	30.6568		19.63	208.301	204.177	114.032	137.389	155.793	152.98	133.759
24.8	53.9092	91.922	17.2092		19.99	209.577	184.258	126.574	115.396	165.386	126.642	157.481
25.25	43.4332	78.0147	28.0428		20.35	185.936	197.985	130.16	149.978	153.96	161.099	149.036
25.71	54.7098	59.4338	28.6512		20.72	157.147	156.427	125.53	102.183	136.925	161.883	119.466
26.18	55.9244	71.7215	26.2844		21.1	163.593	159.561	119.431	106.786	137.123	136.943	139.296
26.66	56.8336	62.1565	20.1416		21.48	180.069	133.604	114.015	132.431	128.619	124.779	137.576
27.14	47.926	40.7035	17.8434		21.87	143.659	131.295	131.06	118.06	140.073	134.358	131.88
27.63	31.6958	57.036	15.502		22.27	134.843	147.906	111.387	101.312	154.495	87.2943	108.913
28.13	47.948	53.4315	20.527		22.67	125.311	129.725	110.615	132.098	141.204	102.08	104.297
28.64	36.7166	48.2435	20.487		23.08	123.037	118.947	125.909	123.708	143.103	103.76	118.438
29.16	57.7244	44.444	21.2694		23.5	105.036	107.637	89.6936	92.4726	110.787	114.939	114.629
29.69	44.3972	40.63	22.5872		23.93	122.329	112.877	111.805	129.1	126.523	108.041	104.148
30.23	30.4864	39.2128	12.4812		24.36	119.045	105.076	109.877	90.9887	105.844	93.4317	109.624
30.78	26.0892	32.2868	23.5964		24.8	91.9056	71.8603	98.9491	123.874	130.278	90.7168	112.063
31.34	31.8476	22.6657	17.963		25.25	122.836	80.1054	99.8748	84.7309	116.448	82.539	93.0138
31.91	48.6566	37.3055	22.605		25.71	95.2341	104.926	106.292	86.9379	99.6694	99.98	83.6507
32.49	24.0988	31.7365	16.206		26.18	106.088	99.2709	86.502	75.7544	100.681	100.355	108.285
33.08	31.2458	33.5513	18.7936		26.66	113.369	81.3917	98.5467	108.55	115.571	93.1902	98.4601
33.68	29.067	17.1823	13.1436		27.14	91.6258	84.2997	98.6812	92.8002	105.905	90.3831	80.5496
34.29	24.3292	21.0945	10.9336		27.63	86.1171	88.0657	85.715	92.1386	83.9828	82.0929	83.8279
34.91	35.4974	43.4608	12.1788		28.13	92.3709	67.1984	96.2827	82.3007	112.887	100.223	79.1689
35.55	37.6864	25.264	13.302		28.64	81.8859	66.6871	96.5522	82.8487	84.6189	82.7048	79.5034
36.19	30.3298	24.9687	7.7782		29.16	71.0359	71.78	88.3557	88.9514	99.5475	65.7584	72.1726
36.85	26.0712	17.1603	13.0148		29.69	73.0143	71.3525	79.9304	82.67	87.0324	67.3167	56.9416
37.52	31.242	27.716	6.2498		30.23	65.3637	77.601	90.6731	82.8877	83.548	79.8596	75.0468
38.2	22.3136	26.177	7.3164		30.78	73.4638	71.8328	87.0333	76.6776	60.7777	65.2244	49.7599
38.89	20.6416	13.7852	7.4752		31.34	69.1451	65.7656	77.0437	82.1393	84.6102	70.0767	57.5891
39.6	24.6794	21.1602	14.5056		31.91	72.581	63.3225	68.747	74.1409	73.0037	69.5389	58.4709
40.32	22.56	17.8738	10.4398		32.49	64.8141	63.4264	79.9476	84.7545	76.3668	51.504	68.6139
41.05	31.624	18.6758	7.771		33.08	63.9548	91.5192	73.5252	66.2401	74.947	63.8779	49.0978
41.79	16.7406	17.1335	4.5278		33.68	79.7801	64.4258	75.6247	80.4363	71.0116	61.9235	48.9375
42.55	30.7576	19.0158	9.1598		34.29	69.4114	71.7086	72.2262	74.6983	75.8418	62.5961	49.3087
43.32	15.5834	16.4125	11.1		34.91	58.8969	55.6828	74.8291	69.5784	67.7402	55.5493	43.4462
44.11	18.4156	20.7542	9.3762		35.55	68.3641	83.3904	64.9463	57.3168	69.5113	58.1684	48.1564
44.91	18.4462	12.3175	9.4856		36.19	63.0862	79.6664	66.646	70.245	56.8278	52.3787	41.917
45.73	11.036	16.4153	5.3746		36.85	65.0233	65.6065	59.7807	68.7939	75.0509	63.5435	40.0923
46.56	16.693	14.1537	3.7726		37.52	55.4817	62.0956	58.0165	61.0473	43.8551	48.7407	32.3699
47.4	21.1526	12.1085	6.8982		38.2	66.5435	60.6606	56.2944	56.759	58.5345	53.2568	35.8061
48.26	21.0308	17.296	3.9274		38.89	59.8034	56.8888	65.6363	53.9439	51.0972	42.724	36.3497
49.14	26.8188	12.1402	2.7644		39.6	62.0748	66.4188	66.3694	55.747	54.7718	52.6039	28.7217
50.03	13.737	20.7177	7.1774		40.32	59.0414	57.4555	71.0949	56.5291	56.1995	49.3565	34.4082
50.94	14.7752	19.1455	5.0918		41.05	59.6332	63.4301	61.9629	51.661	53.9265	44.5631	26.9876
51.86	13.358	13.7648	8.7188		41.79	65.7271	55.9443	59.4771	59.1419	49.1889	43.0111	37.5634
52.8	13.9414	14.1445	5.451		42.55	55.2932	66.3073	65.2106	53.7263	54.4454	48.7248	25.9046
53.76	15.852	11.2132	5.4852		43.32	70.4548	55.0816	62.5337	58.8448	48.6846	35.4322	23.8774
54.74	14.7886	6.76117	6.163		44.11	58.2221	60.0082	70.0913	51.0054	47.7805	43.8881	34.2816
55.73	10.2254	10.8847	5.567		44.91	65.301	60.3587	61.0483	57.6356	69.3192	45.2719	25.5866
56.74	13.8302	14.9572	7.3664		45.73	60.299	63.5018	54.4353	45.3695	51.8247	39.6159	23.4102
57.77	18.367	8.5385	4.8772		46.56	56.7707	54.2866	49.0531	57.3019	48.4696	37.8023	28.7879
58.82	10.0742	5.98267	9.245		47.4	62.7566	60.255	66.2433	53.7844	45.6058	37.1607	30.1955
59.89	15.5744	12.5427	10.0176		48.26	71.8607	61.6845	64.4738	49.6606	53.7222	31.9129	17.0753
60.98	14.7006	9.69583	2.744		49.14	65.0474	71.1709	51.054	50.0186	50.268	36.6978	24.544
62.08	10.7676	10.2597	2.7688		50.03	71.6131	67.3472	56.4567	57.4831	47.8392	33.5161	29.9824
63.21	5.8494	9.51367	6.2722		50.94	69.8869	72.0911	59.9513	50.3996	53.4997	32.1414	22.2792
64.36	12.5086	12.293	9.9292		51.86	69.9613	66.633	65.0273	52.6887	49.2836	28.4859	18.4816
65.52	7.7066	10.4467	5.9448		52.8	83.3581	60.4378	54.2017	51.6249	53.4614	32.8404	21.4571
66.71	11.1956	7.3975	2.247		53.76	63.2995	69.8162	54.2926	46.0191	44.0353	34.3344	16.5102
67.93	13.2602	6.0335	3.0456		54.74	75.4934	61.4268	59.8603	64.1897	53.8191	32.4013	19.4427
69.16	19.556	13.0157	2.9192		55.73	89.6547	59.6424	51.0592	55.1272	44.1021	27.3709	19.1014
70.41	6.406	11.6347	5.1342		56.74	71.0833	66.8553	47.7011	44.2309	41.0376	36.1971	24.3384
71.69	5.1098	8.12517	7.0332		57.77	82.4987	79.6138	65.317	50.8387	49.1561	28.2849	13.1808
72.99	8.5672	7.48683	0.473		58.82	70.1135	73.1574	60.706	38.4066	38.0369	34.7027	13.1249
74.32	5.7898	15.0655	2.3596		59.89	83.3359	82.9837	55.2792	45.368	41.5435	27.2605	13.4681
75.67	6.7546	16.1288	5.2006		60.98	80.3783	81.7493	58.173	59.4147	41.4413	35.7238	11.4824
77.04	8.9522	23.7125	5.3116		62.08	96.0691	77.0697	65.542	39.5562	54.1086	27.431	17.2224
78.44	8.4342	26.254	1.8832		63.21	88.8629	77.2087	67.9378	58.5897	42.5037	34.5906	14.88
79.86	7.198	11.1832	7.7574		64.36	102.799	100.251	64.6802	56.651	38.2347	34.2007	6.91671
81.31	6.6082	21.7288	7.3424		65.52	105.724	78.1064	67.6646	58.3984	39.4784	25.6098	14.0866
82.79	6.273	20.904	2.8718		66.71	104.156	90.8641	61.927	62.9521	43.4282	28.5781	12.1735
84.29	4.0334	4.04533	5.7482		67.93	119.504	92.1101	84.003	53.5256	33.5141	40.7529	11.9489
85.82	8.1476	20.6823	5.7454		69.16	115.506	104.652	74.7057	62.3797	46.037	28.2481	8.31107
87.38	7.2312	11.5767	11.3628		70.41	128.518	96.4425	72.111	68.9476	43.4645	33.5433	14.057
88.96	8.9124	19.3913	10.7254		71.69	119.82	103.955	81.059	54.9854	49.2647	39.1036	11.0314
90.58	3.3114	11.382	9.8452		72.99	139.578	121.404	86.3786	59.5894	56.333	33.0591	11.5309
92.22	10.115	12.5833	14.3288		74.32	157.341	122.904	76.1351	74.5298	39.5043	27.8721	13.6739
93.9	5.3984	28.0532	8.0656		75.67	152.111	120.989	104.911	57.3215	56.8788	40.5803	9.65179
95.6	9.3232	15.9323	4.8456		77.04	158.791	132.103	97.769	72.3192	49.1157	28.8467	13.0534
97.34	4.4318	21.696	8.2244		78.44	181.957	137.366	114.478	92.8099	57.8073	40.1092	10.9655
99.1	3.5784	31.9095	6.5988		79.86	194.167	146.083	112.116	77.6996	57.9454	38.7403	9.21693
100.9	4.8336	20.4018	20.6688		81.31	194.108	161.298	120.77	86.9808	53.3504	37.2315	13.0891
102.74	4.7754	13.044	9.0904		82.79	221.805	162.652	131.244	84.0824	60.7672	40.6413	11.6774
104.6	3.6218	13.4015	14.028		84.29	227.401	175.005	142.552	102.188	52.9203	43.4375	8.8465
106.5	2.0206	14.709	7.6272		85.82	241.809	193.401	159.684	95.6436	54.1919	40.7268	11.9155
108.43	3.7606	14.3808	4.3712		87.38	272.829	189.636	163.7	110.097	64.6328	39.8245	11.2355
110.4	4.8072	14.4622	3.934		88.96	288.378	220.445	190.162	115.247	64.0614	36.9986	8.1075
112.4	3.0812	10.5255	10.3488		90.58	308.695	233.1	198.873	122.895	71.5239	46.8123	6.65014
114.44	3.786	17.2013	3.8418		92.22	344.253	272.046	207.244	138.392	66.521	47.977	5.87864
116.52	4.0924	18.3218	6.043		93.9	380.105	286.835	236.663	166.461	73.3754	47.5499	6.267
118.64	2.8636	23.1993	7.2098		95.6	415.467	338.03	265.481	172.706	85.7194	55.4926	6.16329
120.79	4.711	24.227	9.5774		97.34	466.347	358.176	279.231	186.718	113.017	57.87	6.3065
122.98	2.8502	35.6358	13.0888		99.1	491.781	366.511	304.083	208.984	107.584	61.8038	6.06179
125.21	4.131	56.2218	20.1602		100.9	506.109	390.259	330.173	222.816	108.132	66.5186	6.82914
127.49	1.4142	76.0438	25.3648		102.74	521.823	394.565	334.509	207.468	102.485	63.0875	9.42086
129.8	3.273	111.824	49.6154		104.6	525.416	405.384	351.906	217.796	110.397	58.0313	6.09779
132.16	1.6036	169.774	64.9272		106.5	511.283	383.329	316.533	218.104	86.0537	62.5972	7.93371
134.56	3.8938	202.926	90.7568		108.43	442.618	348.554	274.02	187.595	91.3764	56.9779	6.28271
137	2.1056	280.423	124.734		110.4	375.655	298.472	239.129	167.663	75.4257	52.0987	4.53814
139.49	1.7854	324.148	146.703		112.4	299.596	240.379	193.16	139.547	65.8436	40.3907	4.07286
142.02	3.0918	370.089	154.446		114.44	216.745	181.749	139.551	97.49	48.8498	40.6667	4.61221
144.6	2.8546	389.95	163.862		116.52	154.533	135.404	105.445	57.4619	38.9732	22.4725	3.82621
147.22	2.9056	413.723	154.582		118.64	121.462	92.9202	62.982	47.6774	45.1021	25.7686	4.29457
149.89	3.1152	347.671	160.795		120.79	80.0352	67.6866	52.8023	36.6104	30.3802	21.2961	5.10529
152.61	1.4184	317.902	131.507		122.98	53.8396	44.3213	37.0131	23.9983	28.5287	18.0681	4.44907
155.38	1.4976	225.811	98.2664		125.21	46.0653	35.5104	27.4254	18.6864	25.2508	17.5669	5.26964
158.2	2.823	169.989	82.4348		127.49	31.1702	26.9243	19.2899	15.2966	21.8958	15.1467	5.80064
161.08	1.2502	102.409	48.9172		129.8	30.1032	23.7517	8.66161	18.5639	22.2092	14.4768	3.91879
164	1.862	58.4445	25.3676		132.16	25.6577	23.3852	17.9968	8.91914	18.3385	16.0501	3.86514
166.98	0.3778	29.6113	13.3134		134.56	22.2013	16.6782	11.1317	12.5427	15.4096	15.5157	3.90571
170.01	1.3302	10.909	7.4158		137	18.3831	19.9546	10.3996	8.81393	19.2362	14.3837	4.90471
173.09	3.103	5.825	3.4964		139.49	16.1732	18.1272	11.2452	11.7276	19.7182	15.4807	3.67743
176.24	1.7296	5.49517	3.6566		142.02	20.3509	13.8614	9.26222	10.2272	16.2975	15.4422	4.20214
179.43	2.6694	5.21533	3.6288		144.6	21.3058	24.2201	10.6711	12.8344	19.257	16.7751	2.97829
182.69	0.904	4.22467	5.0114		147.22	16.8743	17.4647	12.958	9.02871	18.4368	17.4466	1.097
186.01	5.7752	1.85467	4.49		149.89	13.6124	19.4257	10.1031	5.03371	17.2533	16.2759	4.67764
189.38	9.1888	9.67683	2.7756		152.61	18.5419	21.1536	8.97465	5.20207	20.099	16.8943	3.53229
192.82	4.51	7.66133	5.9568		155.38	19.1716	14.5848	9.44696	6.4365	16.9288	14.2687	3.23936
196.32	5.6166	5.513	4.7908		158.2	15.7296	17.7485	9.18235	7.06379	17.3484	11.7356	4.28143
199.89	4.9928	4.2545	3.8478		161.08	15.5643	17.574	9.69378	5.98643	16.6906	12.3252	2.36736
203.51	5.4774	4.91383	4.0544		164	16.8954	16.402	6.60509	5.94157	17.1037	14.7127	1.88986
207.21	15.743	8.36917	7.2996		166.98	18.7227	13.7927	7.78483	10.3873	18.0417	15.392	5.40979
210.97	9.5046	5.94333	5.2244		170.01	15.0328	19.4774	6.8553	6.74257	19.2594	16.0675	2.36721
214.8	11.2934	3.78117	5.249		173.09	14.1718	14.2293	9.18074	10.1866	20.6528	16.9931	1.66607
218.7	11.7768	2.664	4.9934		176.24	14.1213	19.6971	7.00913	6.24457	20.9451	15.721	3.19729
222.67	8.1914	5.28917	4.2638		179.43	15.4095	14.1716	9.4147	8.38429	19.3803	16.5571	5.26671
226.71	11.9648	1.75567	5.4398		182.69	15.626	18.0811	6.17504	8.06557	19.9779	17.4525	3.67443
230.82	3.4716	6.293	3.4928		186.01	17.5451	15.4425	7.47013	6.07336	19.5886	18.667	1.74407
235.01	14.7828	2.49817	7.1054		189.38	16.2959	16.3086	4.80487	6.27393	19.2434	19.6372	1.48821
239.28	13.232	5.10167	5.1092		192.82	15.74	19.1967	6.60991	8.40964	19.5679	16.9859	4.37436
243.62	11.1594	8.2315	3.9014		196.32	17.3515	15.6833	4.77774	8.369	22.8675	17.1434	1.30493
248.05	15.2564	2.92767	4.0106		199.89	14.5994	16.6387	5.15274	6.51629	21.1015	14.4132	2.54786
252.55	13.9878	3.09983	6.4622		203.51	20.6419	14.4102	6.58326	6.00221	25.2727	18.3341	0.938571
257.13	10.9488	6.20267	1.1646		207.21	14.1374	19.0909	4.735	4.90343	22.1642	18.7563	4.53171
261.8	7.2232	2.27183	2.5358		210.97	15.5613	15.3591	7.37391	5.66436	19.952	17.8325	2.58121
266.55	13.7012	3.813	2.1014		214.8	16.5892	19.6188	5.27939	5.30521	20.2321	20.3964	2.09257
271.39	14.7616	4.831	3.2638		218.7	14.5125	18.3399	5.89683	6.15836	21.2112	20.0915	0.538643
276.32	9.8582	8.17817	1.1306		222.67	16.3021	15.8532	2.51187	4.93279	23.7039	18.2375	0.666357
281.33	15.257	3.74917	5.2816		226.71	15.2721	15.5619	3.25748	4.8745	25.0817	20.0159	3.08171
286.44	14.4454	4.77767	5.3078		230.82	21.9356	18.7563	6.4603	5.81293	25.4592	18.4953	2.11814
291.64	13.7642	2.85683	1.527		235.01	20.9732	20.9971	6.72761	7.22643	27.5154	19.7067	3.86779
296.93	9.487	5.07833	1.8726		239.28	18.8325	18.3692	5.63513	5.91421	23.9307	23.1883	3.19714
302.32	5.2094	6.228	4.6848		243.62	14.4638	19.7028	5.07878	7.36421	26.377	21.2463	2.87686
307.81	7.4572	2.725	2.7998		248.05	18.4138	19.6213	8.37422	6.397	26.0615	22.5273	4.38979
313.4	4.5958	1.83417	2.1542		252.55	17.9076	19.8957	7.21591	8.40586	23.9268	22.7331	3.89543
319.08	4.0036	4.39617	7.5024		257.13	19.8116	19.8036	3.62904	3.49707	26.056	19.8677	0
324.88	10.6972	3.70817	1.7804		261.8	18.7167	19.6897	6.358	7.98493	29.3986	20.2018	2.43171
330.77	5.3836	5.2265	1.7924		266.55	17.6369	18.0812	3.45104	4.528	26.3802	21.4975	0.769357
336.78	2.7094	6.01567	3.6094		271.39	18.4831	17.6963	6.59726	2.51221	24.8873	21.3989	3.23743
342.89	7.277	3.78317	2.7264		276.32	18.4376	21.227	5.21952	1.03871	27.8595	21.7003	1.0145
349.12	6.4128	3.04783	5.4906		281.33	19.1176	20.1834	4.75004	6.664	28.1367	23.0144	1.51729
355.45	1.8448	6.14367	1.8432		286.44	19.7597	19.2603	6.24657	8.253	29.8717	21.9825	0.789214
361.9	4.6474	5.41583	0		291.64	20.411	18.7912	3.56991	4.63471	28.9087	22.2962	3.27693
368.47	5.6178	5.97317	6.5462		296.93	23.239	21.0268	6.52696	1.60207	27.987	22.1283	1.03157
375.16	7.5508	5.75717	1.884		302.32	19.9282	22.1147	4.4077	6.28357	27.6865	23.0061	2.0895
381.97	4.7528	3.16267	2.8934		307.81	20.5746	20.3211	3.89109	3.48736	33.0053	23.1054	1.55521
388.91	3.8302	3.18667	0.9104		313.4	22.0206	21.3665	1.6037	5.03314	29.2201	25.0735	1.57907
395.96	0	4.01517	3.8558		319.08	20.0786	20.3499	4.85287	2.01771	29.7176	23.2508	3.65407
403.15	1.4828	1.81267	0.9714		324.88	20.024	21.4631	3.60204	2.72379	29.1423	26.1107	1.57779
410.47	3.4116	3.888	2.937		330.77	19.2045	21.8038	3.05687	3.79336	31.1851	24.5723	1.606
417.92	2.963	2.46533	0		336.78	25.265	20.9537	4.18483	1.62514	29.9591	27.0102	1.62457
425.51	5.9822	1.65683	0		342.89	21.4533	24.5393	3.14278	3.83993	31.6325	25.8856	3.19914
433.23	6.0248	1.67183	3.009		349.12	22.4318	21.4441	5.22809	6.08371	33.7531	24.2959	1.08886
441.09	1.7576	4.21317	0		355.45	21.6773	23.8402	2.70487	7.22486	30.9066	25.2379	1.10579
449.1	0.2704	1.698	4.0776		361.9	21.6354	22.7848	3.5383	1.68629	31.3824	25.5799	2.99707
457.25	1.0288	4.2855	1.0278		368.47	24.1534	23.2166	3.182	2.93907	33.5628	27.0182	0.920071
465.55	3.112	1.7265	2.0728		375.16	22.8333	22.4731
474	1.0476	0	1.0452
482.61	0	2.63333	3.1628
491.37	0	2.65517	3.189
500.29	2.1484	3.5755	4.2894
509.37	2.171	0	3.2446
518.61	1.7276	1.8925	1.9108
528.03	1.7688	3.58967	0.8692
537.61	0.7496	2.91367	2.678
