# Supplementary material for: Bubble-mediated generation of airborne nanoplastic particles
Source: Royal Society of Chemistry journal article supplement (doi:10.1039/d4em00124a), 2024-01-01
Supplement: d4em00124a4.xlsx [file d4em00124a4.xlsx]

## Sheet: Ark1
Figure 3A	MilliQ 3.35lpm	PSL 0.88lpm	PSL 1.74lpm	PSL 2.60lpm	PSL 3.35lpm		Figure 3B
Dp (nm)	dNdlogDp (cm^-3)	dNdlogDp (cm^-3)	dNdlogDp (cm^-3)	dNdlogDp (cm^-3)	dNdlogDp (cm^-3)		Flowrate (L min^-1)	Integrated number concentration (cm^-3)
9.91	239.276	99.6993	62.9096	187.748	431.316		3.35	12.7299
10.09	160.894	121.025	97.2043	243.031	470.592		2.6	5.5912
10.27	213.921	105.65	131.403	183.119	363.742		1.74	2.119
10.46	206.921	120.068	70.4503	200.065	452.846		0.88	1.4195
10.65	234.089	107.494	45.5802	145.42	376.897
10.84	192.305	48.0454	64.0331	156.137	261.993
11.04	222.762	79.9062	132.853	166.659	390.078
11.24	255.288	59.7256	81.0554	129.215	299.189
11.44	151.867	103.455	70.4014	193.153	336.681
11.65	217.442	78.918	29.2891	121.711	255.054
11.86	168.02	51.8284	75.3758	122.506	327.652
12.08	177.428	76.5674	52.0139	148.631	262.953
12.3	142.231	90.4604	57.3994	103.414	281.406
12.52	155.386	78.339	47.6123	115.457	266.844
12.75	167.006	67.1916	59.7027	86.9631	186
12.98	171.262	53.0646	50.5266	80.1149	240.682
13.22	195.286	50.9194	42.0202	101.361	174.428
13.46	209.523	34.9695	55.929	104.892	197.657
13.7	201.228	60.4616	53.7254	77.2541	158.83
13.95	156.499	51.7687	33.1614	87.3576	114.959
14.2	165.935	32.1904	34.4611	43.5595	105.708
14.46	203.646	58.933	34.9073	71.9529	102.084
14.72	149.936	34.6939	63.9556	57.747	114.347
14.99	150.759	39.1007	22.2984	79.7629	118.447
15.26	161.76	27.7945	28.7501	41.4824	93.0825
15.54	116.591	38.2684	41.6724	46.7869	91.5207
15.82	148.992	44.377	16.9711	80.529	73.3162
16.11	134.572	11.2762	31.6426	58.4264	106.257
16.4	111.808	25.317	24.3312	49.4266	95.5274
16.7	112.615	22.876	32.8496	43.4057	92.3744
17	119.265	11.057	31.1087	55.3522	76.6937
17.31	118.457	22.5059	27.1117	47.2224	83.9065
17.62	110.603	30.1698	27.5727	33.2866	99.7906
17.94	119.054	22.2449	23.38	44.2014	59.4582
18.27	127.407	23.4159	24.2596	37.0127	69.1509
18.6	110.654	22.7379	16.7994	62.5198	94.0373
18.94	97.2491	16.5685	25.2827	59.8143	106.324
19.28	85.4236	3.55587	19.8989	38.4981	125.277
19.63	103.123	20.8768	24.7541	28.0775	121.577
19.99	74.1796	13.5038	13.537	26.8366	84.7517
20.35	87.2884	12.527	21.9878	34.4926	75.4778
20.72	69.9019	26.2695	12.8291	25.5748	70.8461
21.1	88.2939	7.77975	18.0127	43.4736	54.491
21.48	83.6797	10.7323	24.4002	33.6721	45.5755
21.87	76.1271	13.2836	5.26922	32.6835	41.2545
22.27	79.6511	8.92512	12.834	30.364	41.1443
22.67	82.1833	18.1857	12.5434	33.9911	48.2986
23.08	89.8992	6.89475	11.1006	34.5586	34.1599
23.5	69.4407	8.08713	16.4622	31.0455	41.0497
23.93	56.9622	6.61337	12.641	14.3555	38.3589
24.36	53.3224	7.61287	11.6301	24.4154	30.4985
24.8	54.967	7.4985	8.90233	22.5035	32.5946
25.25	62.306	11.0021	14.1933	22.079	33.7257
25.71	70.5686	9.52887	14.9144	14.2446	27.8574
26.18	60.6668	10.5781	11.4776	19.8305	22.1646
26.66	56.9366	5.64025	13.1876	18.3319	28.5185
27.14	62.0429	9.99912	11.862	17.8276	28.8243
27.63	37.1346	12.0597	12.7429	15.1824	25.6068
28.13	48.3254	7.314	8.54944	15.0687	16.3379
28.64	58.0111	9.758	8.41433	12.3042	24.5516
29.16	29.7682	8.2395	7.35	24.7416	30.9804
29.69	41.2066	10.1171	4.40911	14.8271	20.5902
30.23	31.4646	5.99338	9.75989	20.0591	19.5158
30.78	21.7929	7.85487	7.75678	14.4839	14.1833
31.34	31.2804	4.77325	6.23311	13.3226	13.9098
31.91	31.6475	10.392	7.55078	16.8494	18.3414
32.49	29.3186	3.60812	7.67278	8.28138	16.5605
33.08	28.7479	4.48513	6.371	9.84838	14.2151
33.68	38.5281	8.02613	12.7126	12.3594	19.9815
34.29	21.9121	4.32463	9.26022	11.3265	13.9521
34.91	23.9608	10.312	7.57067	8.55312	10.5628
35.55	24.4835	5.822	10.5343	15.2915	15.341
36.19	28.7064	8.28937	5.17644	8.961	16.9519
36.85	25.2572	10.5529	7.27556	16.2111	15.8935
37.52	25.3721	5.51213	4.15511	13.5476	14.3114
38.2	31.4232	10.3771	10.4703	8.37525	9.66082
38.89	18.9804	9.1665	12.7193	13.0031	8.738
39.6	25.495	6.74463	4.49367	13.3175	10.2617
40.32	26.5162	6.78338	8.13067	7.55638	11.1937
41.05	22.5572	4.31375	7.25011	14.8785	11.5315
41.79	22.3625	5.52487	4.03144	14.4649	8.82855
42.55	28.5029	5.7885	7.48733	11.9505	12.1464
43.32	22.7076	4.23375	4.00889	9.5235	7.96064
44.11	25.2538	5.53188	4.92856	8.21438	11.0955
44.91	18.867	2.68337	4.09056	10.738	6.74209
45.73	18.9174	3.27637	7.82244	6.40988	8.09209
46.56	17.3129	4.50338	7.98433	6.30738	12.2259
47.4	15.8574	7.20937	7.21289	7.72125	11.1244
48.26	12.2415	4.85013	3.251	9.41737	8.87782
49.14	18.3426	4.94425	8.59489	5.2705	7.45664
50.03	14.6657	3.7985	4.81022	6.50812	6.72827
50.94	10.3481	6.23763	3.83167	7.69337	8.67373
51.86	15.8468	2.61063	2.24411	6.00625	5.85164
52.8	6.56975	4.29462	5.89611	8.70688	6.71609
53.76	12.3365	4.0795	3.57222	5.44675	8.32973
54.74	13.9462	5.39088	5.153	6.42575	9.61236
55.73	12.1696	3.50862	3.48889	8.5105	8.129
56.74	12.0105	2.1765	5.03822	8.2995	8.02009
57.77	10.1565	5.214	2.096	6.76288	8.65718
58.82	11.066	3.657	2.66989	4.76725	7.86109
59.89	12.7238	7.1695	2.99033	6.97175	8.68709
60.98	7.16212	6.5875	7.168	5.34938	4.14309
62.08	12.7037	1.61575	2.68378	8.63175	8.52818
63.21	7.33188	3.26275	6.31378	7.19075	7.08936
64.36	6.642	2.71	3.84733	4.15313	7.48982
65.52	9.42938	3.05762	3.99744	6.67213	8.10336
66.71	7.43337	2.7005	8.28989	5.55638	5.04336
67.93	5.86913	4.35687	4.56911	7.27325	10.7665
69.16	11.109	2.549	4.662	10.3116	6.73282
70.41	10.6825	4.60112	4.844	6.68663	9.01727
71.69	7.79063	4.05138	3.71744	5.68987	6.31673
72.99	4.74975	3.4655	5.02522	5.19	8.58164
74.32	9.45775	2.63212	6.66844	7.30237	11.7469
75.67	7.80987	5.21887	7.81089	4.27813	8.21427
77.04	8.57725	1.0845	2.964	10.0881	8.82727
78.44	6.335	2.8085	1.94989	7.54988	9.45209
79.86	9.39862	3.47962	2.26189	8.241	8.28691
81.31	2.71925	3.279	5.76867	7.66387	4.78264
82.79	5.46125	3.58738	7.39122	6.12113	11.0024
84.29	5.3445	0.96425	5.33011	7.53375	13.1524
85.82	5.06088	4.90038	7.09244	6.66737	10.4371
87.38	7.99725	4.3585	7.03956	8.21462	10.4527
88.96	8.39413	1.59438	4.93133	15.3191	16.7161
90.58	4.08225	2.69413	3.53	6.68288	11.1721
92.22	4.17475	1.17213	4.01322	8.376	16.5817
93.9	4.56787	1.3825	4.13478	4.38462	12.2315
95.6	3.8125	0.641875	4.98789	7.88413	13.0951
97.34	4.59962	2.19387	4.832	8.92938	13.2786
99.1	6.19538	5.497	8.93578	13.305	17.2503
100.9	3.30925	4.89875	4.93667	8.11588	8.40836
102.74	2.17762	3.94238	8.07422	7.75625	16.777
104.6	5.283	1.53087	1.887	10.2311	6.44445
106.5	3.51887	0.548625	5.19056	11.016	7.39345
108.43	3.97162	0.29625	2.82667	6.35975	9.29891
110.4	4.532	4.78963	2.54956	7.17263	9.28691
112.4	5.59225	3.85925	4.36944	9.2655	5.63309
114.44	2.95325	4.351	3.59933	6.28775	8.92309
116.52	3.95187	1.84438	4.25722	5.463	9.49655
118.64	1.81425	3.46338	5.15211	9.16675	11.1883
120.79	7.74075	0.906	3.613	7.45712	17.3527
122.98	5.09775	1.8325	4.79167	8.0235	18.9438
125.21	5.22025	4.63775	5.189	7.90275	21.5381
127.49	3.28512	4.91875	5.79189	16.9668	32.8724
129.8	4.7565	4.0875	10.3048	26.7793	46.0344
132.16	2.21787	4.55738	9.19744	30.6062	71.2527
134.56	2.28775	6.0085	12.0941	41.0779	100.764
137	2.067	11.1421	24.8084	52.1225	112.071
139.49	4.9975	11.5236	23.4384	66.3024	139.218
142.02	4.5105	8.19112	25.5277	73.3545	167.233
144.6	1.957	15.5701	24.8629	84.9921	168.423
147.22	4.91887	12.1145	21.5638	60.1108	178.414
149.89	1.33475	10.7353	22.4558	71.2061	156.52
152.61	4.03512	4.88475	18.8679	54.9975	131.877
155.38	2.918	7.4715	17.987	32.4404	109.479
158.2	3.5825	10.015	8.99411	35.7604	67.6965
161.08	5.30987	5.9995	8.51622	22.385	48.1809
164	3.16962	2.80075	4.77522	8.97075	21.5208
166.98	1.80187	3.33462	5.37211	5.55162	9.52345
170.01	2.11662	1.87912	1.15578	3.77787	5.24127
173.09	3.86575	2.1795	2.96156	3.88488	5.02755
176.24	3.39662	3.05075	5.87267	3.7265	4.08382
179.43	3.28425	3.169	5.181	5.19787	5.19491
182.69	3.1415	3.13537	4.39689	2.04825	5.23709
186.01	3.1705	4.34825	2.29311	2.0645	3.90418
189.38	3.39662	3.0135	4.24822	5.38275	5.30091
192.82	2.05313	3.85613	2.98922	4.11525	6.18045
196.32	2.711	0.883375	5.44778	6.8615	3.83409
199.89	2.53613	5.72275	3.71022	5.06175	4.23791
203.51	2.46813	3.02562	3.04489	5.12525	2.38427
207.21	2.573	4.3365	3.64267	3.29375	3.95909
210.97	2.931	4.9735	2.45489	7.82875	4.09045
214.8	2.7225	2.7395	2.87289	3.1305	5.583
218.7	3.52275	3.7485	2.82311	5.40175	2.44718
222.67	1.98762	4.41825	3.64133	4.49488	4.637
226.71	5.00762	1.09638	2.85022	3.15212	6.34545
230.82	2.213	3.68562	3.08678	5.74313	3.98109
235.01	0.24875	4.1375	0.697778	0.97225	4.06773
239.28	2.851	6.34037	2.24133	3.168	3.68673
243.62	3.109	1.6935	2.788	4.33775	5.96391
248.05	1.02337	2.94738	2.27322	5.22213	7.30055
252.55	2.67675	3.31175	3.47678	0.526875	4.17464
257.13	1.552	2.58637	3.79722	1.8285	4.71782
261.8	2.92313	7.09275	2.67467	6.07937	3.38336
266.55	2.87787	6.667	2.129	3.53075	7.03445
271.39	5.82562	5.2575	2.99822	2.53175	5.10318
276.32	3.6625	2.6175	2.29889	3.239	4.559
281.33	1.27313	2.549	1.85233	4.21662	4.71955
286.44	3.0625	3.44787	1.89778	5.3215	4.92809
291.64	0.65825	4.47487	0.955333	3.34287	5.42409
296.93	1.624	2.44112	2.73789	1.2215	6.12555
302.32	2.28112	3.36375	2.70344	4.1235	4.52873
307.81	1.64587	4.66825	2.20578	1.72762	2.52909
313.4	3.77975	0.968375	1.29856	0.799625	3.49082
319.08	1.839	5.55337	2.616	2.94325	4.69191
324.88	2.23725	3.58537	0.991778	3.80875	2.43518
330.77	2.2515	3.9315	3.49556	2.90563	4.90291
336.78	1.70087	3.95875	4.52478	2.82888	4.12127
342.89	2.28362	4.5555	4.04833	1.7085	6.21955
349.12	1.72475	3.441	2.54944	2.295	4.94264
355.45	1.73537	3.71638	2.05378	2.88863	3.43018
361.9	2.9165	4.99025	2.06822	1.1635	3.38645
368.47	1.17487	6.4385	2.08444	2.9305	2.55755
375.16	2.36725	4.72262	1.04978	1.1995	5.06045
381.97	0.366375	7.1385	0.528778	4.14787	3.13964
388.91	4.43513	3.59612	2.12989	2.09675	3.49509
395.96	0.605125	2.41637	2.68533	2.11775	3.51473
403.15	1.39362	6.08613	1.62389	2.435	2.21364
410.47	2.28425	3.68038	0.545444	0.52675	0.892364
417.92	1.24025	6.18462	2.199	2.56263	2.70218
425.51	1.87363	2.49363	2.216	2.49475	2.26773
433.23	0.629625	4.39888	2.83289	3.143	2.74755
441.09	3.17387	3.16812	1.78378	0.633625	1.84409
449.1	1.28125	4.472	1.00011	1.27825	1.39773
457.25	1.29012	1.28825	0.572556	2.57837	3.27982
465.55	2.03075	5.1945	0.577333	1.29963	1.88945
474	3.20575	3.93012	2.32944	1.965	2.86218
482.61	0.661875	1.98125	0.587222	2.64312	0.961364
491.37	1.335	3.9975	0	0.66625	3.39318
500.29	1.34712	1.344	0.597333	1.344	0.977455
509.37	2.03737	2.71013	3.01278	0.677875	1.97555
518.61	0	9.712	0	0	3.13509
528.03	1.10775	2.19988	0.488444	0.55175	4.38827
537.61	1.173	2.36738	1.26356	1.65787	2.07509
