# Supplementary material for: Bubble-mediated generation of airborne nanoplastic particles
Source: Royal Society of Chemistry journal article supplement (doi:10.1039/d4em00124a), 2024-01-01
Supplement: d4em00124a5.xlsx [file d4em00124a5.xlsx]

## Sheet: Ark1
Figure 4	PSL in milliQ	0.01g/kg salt	0.02g/kg salt	0.05g/kg salt	0.1g/kg salt	0.2g/kg salt	0.4g/kg salt	1g/kg salt
Dp (nm)	dNdlogDp (cm^-3)	dNdlogDp (cm^-3)	dNdlogDp (cm^-3)	dNdlogDp (cm^-3)	dNdlogDp (cm^-3)	dNdlogDp (cm^-3)	dNdlogDp (cm^-3)	dNdlogDp (cm^-3)
9.91	657.879	5821.34	9560.24	12792	19507.5	28971.4	36242.1	34170.8
10.09	661.75	5720.42	1303.41	13120.1	20343.3	30765.8	38359.2	36599.5
10.27	547.436	6386.93	9940.37	14229	23487.7	35272.8	43946.1	41825.3
10.46	469.178	7293.43	10830.2	16110.1	26042.4	40347.1	49936.6	48029.8
10.65	517.297	7682.84	11579.9	16717.4	27172.9	42958.2	53970.5	51517.5
10.84	521.43	8545.83	12014.8	17436.4	28945.8	46681.5	57543.7	55670.1
11.04	497.864	8609.17	12338.5	18306.5	30548.8	49783.9	61837.4	59341.7
11.24	459.389	9130.48	12669	18719.7	32260.5	53312	66447.5	63817.1
11.44	364.932	10462.1	13430.1	19633.7	33757.5	56987.5	70538.5	68398
11.65	404.467	11526.3	13856.8	20217.3	35967.1	60334.5	76224.8	72147.3
11.86	308.749	11958	14217.9	20901.1	37286.5	63653.1	80673.4	78163.5
12.08	289.899	12908.8	14786.4	21810.8	39057.1	66153.2	85833.4	84337.3
12.3	322.452	14265.4	15362	22226.3	40079.6	70588.7	91030.1	88850.7
12.52	269.213	15714.6	15953.3	23052	42090.6	74171.3	97041.6	94191.2
12.75	246.23	16606.4	16698.1	23598.5	44124.8	77912.8	103102	99754.7
12.98	273.048	18357.7	17515.5	23963.4	44797.7	80956.3	109022	107195
13.22	247.561	19536.2	18712.1	24799.5	47086.3	84946.3	115491	111723
13.46	217.011	21380.1	18912.1	25762.2	47866.6	88021.3	121759	118679
13.7	224.969	22968.3	20055.7	26199.4	50352.4	90227.3	129027	125531
13.95	233.371	25522.1	21460.2	26731.4	51101.8	94721.7	138102	132664
14.2	173.827	27040	21887.8	27057.5	52571.5	98181.3	143810	140846
14.46	183.689	29530.6	23555.4	27826.6	53424.6	100890	152829	148368
14.72	152.131	31668.4	24707.3	28708.9	55008.9	103846	161758	156147
14.99	169.927	34123.6	26008.4	29129.7	56074.6	107381	171446	166732
15.26	140.776	37238	27073.2	30378.3	56928.2	110533	180479	174661
15.54	158.114	38900.5	28939.8	30750.9	58452.8	112275	188477	184329
15.82	141.756	41928.8	31128.1	31975.3	59310.3	116085	199849	193419
16.11	106.627	44893.4	33111.1	33062.2	60726.8	117544	210695	203898
16.4	104.759	47175.1	34977.2	34531.5	61844.2	121566	221391	215459
16.7	109.955	49587.7	37857.1	35427.1	62091.5	124939	231953	227135
17	122.238	51390.3	39673.4	36736	63162.1	126635	242029	237041
17.31	116.679	53261	42205.2	38494.5	63756.1	129805	252288	248928
17.62	117.441	55176.8	45797.5	39520.8	64639.8	131578	264633	260450
17.94	103.112	56485	48027	41017.2	65423.5	132044	272851	268576
18.27	96.4209	57141.7	51122.2	42785.5	66122.2	134881	284991	281066
18.6	97.3895	58659.5	54148.1	44757.9	66613.1	135788	295190	290859
18.94	98.3962	58545.1	57346.8	47104	68346.3	138340	306147	302308
19.28	100.652	59072.2	61300.1	49244.9	69752.6	139089	316714	311418
19.63	102.344	59485.3	64436.5	51871.7	69889.1	140010	327643	321857
19.99	74.736	58967.8	67404.3	53975.4	71423.6	141920	338017	330675
20.35	81.2219	58039.1	70830.6	57280.8	73245.9	142981	347767	342027
20.72	89.8789	58620.3	74021.8	60339.5	74401.9	143805	358064	351508
21.1	80.474	57262.3	76363.7	63398.7	75582.8	143533	365976	359408
21.48	89.4309	56327.2	78936.1	66818	77011.7	146485	373958	367373
21.87	82.7896	56086.5	81643.6	69971.1	79443.7	145795	381608	376075
22.27	67.781	54223.7	82896.9	74256	81067.1	145579	389453	381645
22.67	63.4545	52951.2	84431	78354.3	82905.4	146429	396444	388612
23.08	71.5305	52213.7	85296.9	82699	85311.3	145952	402763	396459
23.5	60.0189	50995.4	85383.4	86759.7	87701.7	146559	408361	402007
23.93	60.9696	49446.5	86006.4	91304.8	90397.3	146589	412178	408873
24.36	51.4369	47628.4	86178.3	94431.5	93608	147110	416004	413013
24.8	52.9883	45709.8	85060.4	98996.1	96634.3	147796	420522	415487
25.25	56.5879	44386.2	84944.1	102226	100168	148793	424556	419071
25.71	53.9555	42806.7	84365.4	105144	104108	149193	428535	422657
26.18	53.6469	40733.5	81716.2	107541	108090	150323	429902	424670
26.66	62.5081	39171.8	80924.9	109685	112484	151274	432305	427419
27.14	58.7906	37079.3	78907.2	111410	116517	152510	434587	429286
27.63	49.0716	35177.1	77481.9	113200	122368	154162	433050	430285
28.13	46.8328	33441.9	75176.7	114107	126793	155042	435792	428982
28.64	44.5877	31071.2	72880.5	114716	132283	157315	435265	428777
29.16	47.4967	29262.7	70608.4	114375	137577	159629	432075	427271
29.69	39.6844	27515.8	68130.6	113155	143436	162374	430767	424901
30.23	44.5056	25793.6	65529.8	112844	149476	164316	429267	423624
30.78	50.9361	23563.4	62818.2	111438	153542	168436	426862	422262
31.34	52.2042	21868.6	59840.2	109112	158531	171317	423193	419620
31.91	49.6754	20232.6	57026	106270	162675	175394	419182	414878
32.49	41.2985	18629.5	54104.3	103918	166064	179717	412954	410783
33.08	55.0965	17014.3	51527.9	100199	170774	184340	410193	405010
33.68	36.5332	15416.7	48119.3	97115	173223	188714	406314	399231
34.29	51.6316	14197.1	45257.4	93766.3	175483	193956	401882	395560
34.91	51.9449	12711.3	42271.3	89810.5	176374	199830	394519	390678
35.55	42.2565	11419.8	39397.7	86381.1	176279	205002	387826	383794
36.19	51.7375	10174.7	36842	82251.8	176262	212849	379883	377728
36.85	44.3235	9167.29	33910.1	77780.9	174908	218904	374368	371174
37.52	40.6468	8007.66	31341.8	73640	172371	225250	368010	366263
38.2	42.5212	7166.23	28665.5	69105.2	169056	231393	362301	360871
38.89	42.6888	6354.65	26091.5	64876.9	165092	237274	354025	352797
39.6	48.0985	5529.91	23790	60426.8	161108	243711	346965	346094
40.32	61.9563	4868.02	21648.1	56450.6	155605	247511	341839	338729
41.05	49.3655	4273.03	19405.1	52309	149753	251769	335669	333332
41.79	49.2266	3737.1	17481	48615.1	143834	255168	328862	328493
42.55	45.5392	3193.38	15563	44452	137083	257265	324751	321762
43.32	53.7038	2869	14059.3	40926.1	130825	258945	318927	316517
44.11	50.5887	2441.66	12380.4	37449	123296	259353	314783	312513
44.91	50.0053	2077.25	10934.3	33920.5	116497	257612	311626	308848
45.73	44.7026	1773.25	9740.75	30958.6	109281	255124	307897	305878
46.56	51.8242	1557.26	8488.1	27625.2	102296	250905	305138	302367
47.4	64.0795	1365.8	7437.37	24902.2	94923.4	246627	304169	298367
48.26	48.3785	1200.71	6522.26	22374.6	88056.2	240723	301307	296255
49.14	53.6425	975.202	5580.46	19939.6	81178	233448	298906	295822
50.03	53.5343	901.312	4937.96	17742.7	74288.7	225258	298205	294053
50.94	48.1239	831.617	4257.17	15726.2	68098.6	215548	297727	293234
51.86	50.2449	679.273	3695.27	13856.7	61950.7	205296	298158	294158
52.8	49.5743	602.686	3206.84	12216.4	56067.3	194304	299076	293745
53.76	49.4602	546.298	2734.75	10781.4	50609.8	182831	300244	295019
54.74	60.2983	478.78	2334.34	9353.65	45488.1	172565	302484	296212
55.73	56.2659	423.014	1981.72	8216.81	40735	161188	305458	297162
56.74	56.7839	376.768	1760.03	6978.64	36381.2	149089	307759	298596
57.77	47.8187	345.5	1541.94	6159.49	32266	138067	310341	300426
58.82	66.1968	313.845	1275.68	5258.35	28277.8	127269	313650	303708
59.89	57.9009	282.559	1074.42	4578.49	25153.9	116571	316588	306871
60.98	66.3549	274.885	949.218	3986.95	22051.2	106593	320429	309138
62.08	55.9554	230.448	773.451	3393.28	19314.1	96898	323420	312912
63.21	71.4521	228.607	709.908	2985.04	16978.9	87616	327490	314155
64.36	63.0345	226.821	607.042	2526.71	14853.1	78735	330786	316760
65.52	65.9255	201.246	486.644	2190.79	13096.6	70582.5	333696	318056
66.71	57.0916	197.568	453.004	1908.03	11290.9	63351.7	335029	319841
67.93	55.9034	184.85	370.036	1672.88	9902.11	56649	335470	320840
69.16	50.5492	156.02	298.292	1438.25	8648.99	50194.2	335697	320034
70.41	48.413	170.823	260.751	1207.78	7370.64	44699.1	333476	318223
71.69	57.0378	145.003	241.467	1039.34	6506.08	39536.7	331415	314300
72.99	44.2144	155.357	198.992	916.755	5636.31	34869.2	325741	309169
74.32	53.3909	116.875	173.999	760.575	4876.09	30763.7	320441	303881
75.67	36.5411	131.977	160.338	683.046	4317.76	27133.1	313337	297760
77.04	44.7298	122.998	125.075	576.563	3700.85	23545.2	304074	287893
78.44	53.832	122.563	124.293	527.132	3219	20840.4	293483	278398
79.86	58.465	119.549	100.952	436.215	2901.15	18286.1	283018	268281
81.31	40.7927	108.679	93.6967	360.386	2479.17	15854.3	271139	255509
82.79	35.6322	102.227	87.1259	347.099	2171.93	13941.8	258302	243304
84.29	48.2614	89.4895	67.2341	265.951	1875.19	12251.7	243671	231558
85.82	35.6423	109.319	54.2781	236.376	1614.86	10740.6	229226	216700
87.38	50.7069	89.8733	56.3571	220.866	1418.21	9403.56	213927	203429
88.96	37.2069	99.5005	52.483	172.57	1279.52	8273.43	200099	189468
90.58	61.4186	83.0825	57.3141	171.66	1124.81	7197.1	186191	175965
92.22	49.6164	86.981	48.3357	134.185	962.222	6452.68	171654	162021
93.9	48.3876	85.3797	45.6763	112.356	837.749	5556.3	158065	149624
95.6	47.1275	76.2702	50.587	125.998	756.052	4971.58	144726	136224
97.34	44.8065	69.5866	43.9359	112.859	665.412	4342.02	132090	124877
99.1	43.0477	75.4783	49.3925	104.67	542.448	3859.91	119604	113268
100.9	53.1742	89.87	43.3861	82.4814	492.733	3379	108666	102258
102.74	46.4692	77.7452	48.6094	73.2259	423.035	3002.7	97433.7	92041.8
104.6	62.6858	71.9071	37.5897	73.8034	381.783	2658.83	87475.1	82588.8
106.5	54.405	67.074	34.0393	68.2207	305.909	2357.38	78410.8	74341.7
108.43	53.7156	75.5665	37.9947	49.9253	270.112	2023.31	70204.3	66225.9
110.4	53.9261	76.949	32.0415	55.9531	229.506	1802.63	62494.9	59089.7
112.4	58.0922	79.9513	41.0042	50.4677	208.342	1576.02	55677.2	52455.7
114.44	57.266	70.7476	42.248	58.4601	192.889	1445.08	49620.5	46382.6
116.52	59.0265	68.582	39.5341	47.5339	183.658	1256.96	43866.3	41036.7
118.64	44.6406	71.0217	40.5915	51.6306	148.343	1089.73	38454	36315.3
120.79	65.2115	87.4849	49.7731	52.771	152.726	938.897	34069.4	32007
122.98	73.6528	86.8469	51.0348	58.4489	115.765	874.337	30206	28178.3
125.21	71.3814	112.895	70.7052	61.3639	137.756	733.489	26701.4	24795
127.49	80.9395	120.514	93.9544	85.6214	149.225	658.479	23397.9	21693.5
129.8	96.9022	141.532	112.183	115.04	158.479	598.556	20672.8	19245.1
132.16	107.623	170.297	160.491	157.693	188.608	578.806	18340.4	16786.1
134.56	138.225	229.592	184.706	185.1	223.853	562.282	16107.9	14844.1
137	163.857	250.795	239.244	231.919	249.371	547.433	14080.1	12990.2
139.49	163.848	313.87	266.897	264.863	292.973	540.083	12447.2	11430.5
142.02	186.774	331.387	308.942	292.838	326.887	530.753	11034.2	10181.3
144.6	193.723	333.981	311.817	290.593	353.677	535.064	9793.51	8936.12
147.22	176.477	318.673	281.872	291.3	339.029	506.994	8705.65	7835.16
149.89	156.502	282.238	256.88	267.397	333.044	507.633	7785.57	6975.72
152.61	132.79	234.033	213.796	226.477	285.421	453.128	6862.84	6058.98
155.38	103.968	179.968	143.676	179.888	221.991	401.381	6037.9	5435.5
158.2	68.4058	141.059	114.63	124.409	164.193	328.284	5338.47	4801.27
161.08	54.4665	94.2082	71.052	85.7178	125.665	267.369	4793.49	4138.95
164	39.195	56.5332	52.6243	62.1784	78.3786	205.279	4230.52	3687.84
166.98	33.4543	41.3176	33.6564	44.1086	55.6704	160.293	3644.62	3232.59
170.01	28.4296	38.5407	18.9035	27.8346	38.3166	128.405	3211.02	2758.03
173.09	26.5397	30.994	20.7227	22.569	40.5826	110.292	2902.84	2421.81
176.24	22.9032	44.9089	14.8622	23.9043	27.8944	88.8292	2513.32	2124.2
179.43	30.2255	37.8485	21.7904	29.0676	22.4811	80.2456	2180.52	1859.49
182.69	27.6754	32.7648	18.5233	20.8357	24.3198	66.0234	1940.91	1608.03
186.01	26.1197	30.7502	18.9038	24.0217	22.8249	68.2148	1708.97	1390.14
189.38	20.4427	21.0309	18.0976	19.2521	34.6761	58.4184	1463.97	1198.47
192.82	29.9596	31.9081	14.8916	23.8637	31.0454	45.0571	1280.1	1042.51
196.32	20.9875	27.8531	17.6779	19.8576	24.5619	42.5158	1094.02	876.666
199.89	24.4965	28.5081	19.6715	21.3384	25.644	44.5329	941.797	724.132
203.51	27.1574	25.7766	20.758	18.1693	20.7881	37.781	782.957	610.476
207.21	29.5658	22.4106	22.8741	16.7069	26.4437	36.2035	705.956	524.06
210.97	20.3145	23.5781	14.9965	13.2074	17.1091	26.3621	605.45	463.792
214.8	11.8099	21.3498	11.4861	20.1919	17.7024	34.471	514.062	359.725
218.7	13.9043	20.0826	15.5364	19.4471	19.7351	23.2854	439.873	300.017
222.67	11.619	17.4234	16.0784	17.2581	23.1125	28.9735	347.157	230.632
226.71	17.858	21.1214	13.3831	16.1042	16.9244	24.3159	315.11	197.549
230.82	12.8279	21.111	18.0574	15.0679	26.9231	32.3737	232.757	160.489
235.01	15.3164	19.6017	15.0346	17.6509	17.9382	18.8641	151.537	57.3179
239.28	10.2318	15.494	18.5905	18.4214	22.2792	32.4387	185.181	81.7716
243.62	15.0535	15.6721	16.1878	19.1623	22.7431	20.9952	130.287	58.5325
248.05	12.3213	19.4995	19.5459	20.6461	25.501	25.9164	91.4001	34.5349
252.55	14.4212	17.7812	11.9571	13.7448	25.1554	28.5464	66.8005	10.5999
257.13	13.8236	17.8788	15.3128	23.3879	21.8922	24.2131	37.2372	9.01071
261.8	11.1111	15.6217	15.4063	16.1884	16.4695	23.2276	17.9239	0
266.55	8.73682	14.2025	19.4336	17.2448	24.7496	27.234	10.0903	2.68664
271.39	10.9982	18.4993	15.8151	14.2591	19.2086	25.1178	2.3715	0
276.32	11.1497	15.2919	15.0303	18.3814	18.2371	23.1531	2.966	1.43464
281.33	9.55873	13.3078	14.7419	14.2232	20.7806	28.3172	7.61529	4.91371
286.44	6.41327	6.12764	15.1106	16.2566	23.8695	21.3706	1.30507	0
291.64	5.483	21.3702	15.4822	16.4244	17.836	20.8019	0	0.088
296.93	2.66091	12.9218	16.3162	12.7409	20.0307	22.8137	0.0461429	0.223714
302.32	5.36273	16.965	12.4812	18.1871	20.0354	22.2207	37.1196	34.8492
307.81	7.46191	14.416	14.3896	19.2194	21.6447	27.1583	24.0426	27.5136
313.4	7.55182	7.62118	8.05507	14.5647	14.3539	22.1512	0	0.300429
319.08	6.21409	13.3154	12.2216	17.5384	16.8047	30.9686	42.3745	74.5554
324.88	4.50155	17.463	16.0756	16.3926	27.7495	36.4608	90.9026	104.643
330.77	9.48182	9.63327	13.7042	14.4776	18.6586	32.6493	102.037	113.294
336.78	4.16027	15.3629	14.9496	20.6991	24.9066	33.6971	108.37	133.482
342.89	7.85891	8.36482	10.8801	18.6663	20.5211	38.9196	116.407	137.877
349.12	6.47282	11.8004	13.755	18.5861	20.5046	31.1074	127.673	140.378
355.45	7.13927	12.2209	15.3731	12.6715	26.2637	39.5921	139.287	162.188
361.9	7.23164	10.3205	17.2804	17.6199	20.8629	36.6654	148.04	172.118
368.47	4.73091	12.0421	10.1002	18.2502	20.4131	34.6801	165.431	193.021
375.16	4.33264	7.37427	12.2116	14.6031	23.496	39.4784	177.776	211.927
381.97	4.80391	6.992	10.6304	18.1861	18.2399	32.2145	204.332	213.319
388.91	4.93373	8.804	11.7919	12.7751	24.3656	29.76	195.935	228.961
395.96	6.55345	8.42373	10.9821	13.4179	15.7554	29.6326	207.065	252.111
403.15	4.91573	7.59918	12.4059	15.7596	16.6189	35.0276	215.683	269.999
410.47	4.50145	4.95145	10.7108	10.1129	16.1007	31.1377	257.141	281.313
417.92	4.08045	7.05618	9.64936	14.6371	16.8296	22.0555	248.931	286.22
425.51	4.57291	6.61073	13.6138	11.9526	15.7129	28.7239	252.477	281.37
433.23	3.23018	4.61636	5.77571	7.08157	13.7851	27.0703	275.417	291.046
441.09	2.32518	6.045	8.37364	11.8805	17.5586	30.6813	261.036	293.348
449.1	3.01173	6.08918	6.97507	12.4572	18.4303	22.3196	274.732	303.665
457.25	1.21845	7.092	6.30414	10.4476	18.9421	26.7047	270.179	294.597
465.55	1.30209	5.24182	7.45429	7.831	16.0589	24.9591	260.437	263.511
474	5.41445	9.13709	7.14757	12.4784	14.195	21.0802	246.877	241.812
482.61	3.39436	9.69773	6.9295	10.3548	13.4853	23.045	233.763	242.652
491.37	4.40064	7.82691	6.53186	9.06214	12.7653	23.2656	211.095	221.626
500.29	4.40345	6.90909	5.66671	9.29536	13.4516	21.5167	197.377	197.512
509.37	2.52545	4.97418	8.95743	4.79193	12.8826	25.257	171.314	183.994
518.61	2.50764	6.01818	0	5.95214	7.87864	27.7217	0	10.3296
528.03	0	0	6.68743	0	0	22.2249	156.305	160.647
537.61	3.10791	4.52218	6.59621	7.92843	11.3811	17.5831	143.87	127.433
